# Supplementary material
Source: publisher figshare collection journal article supplement (https://gsapubs.figshare.com/ndownloader/files/22411779)
Supplement: Supplementary file 1 [file 22411779]

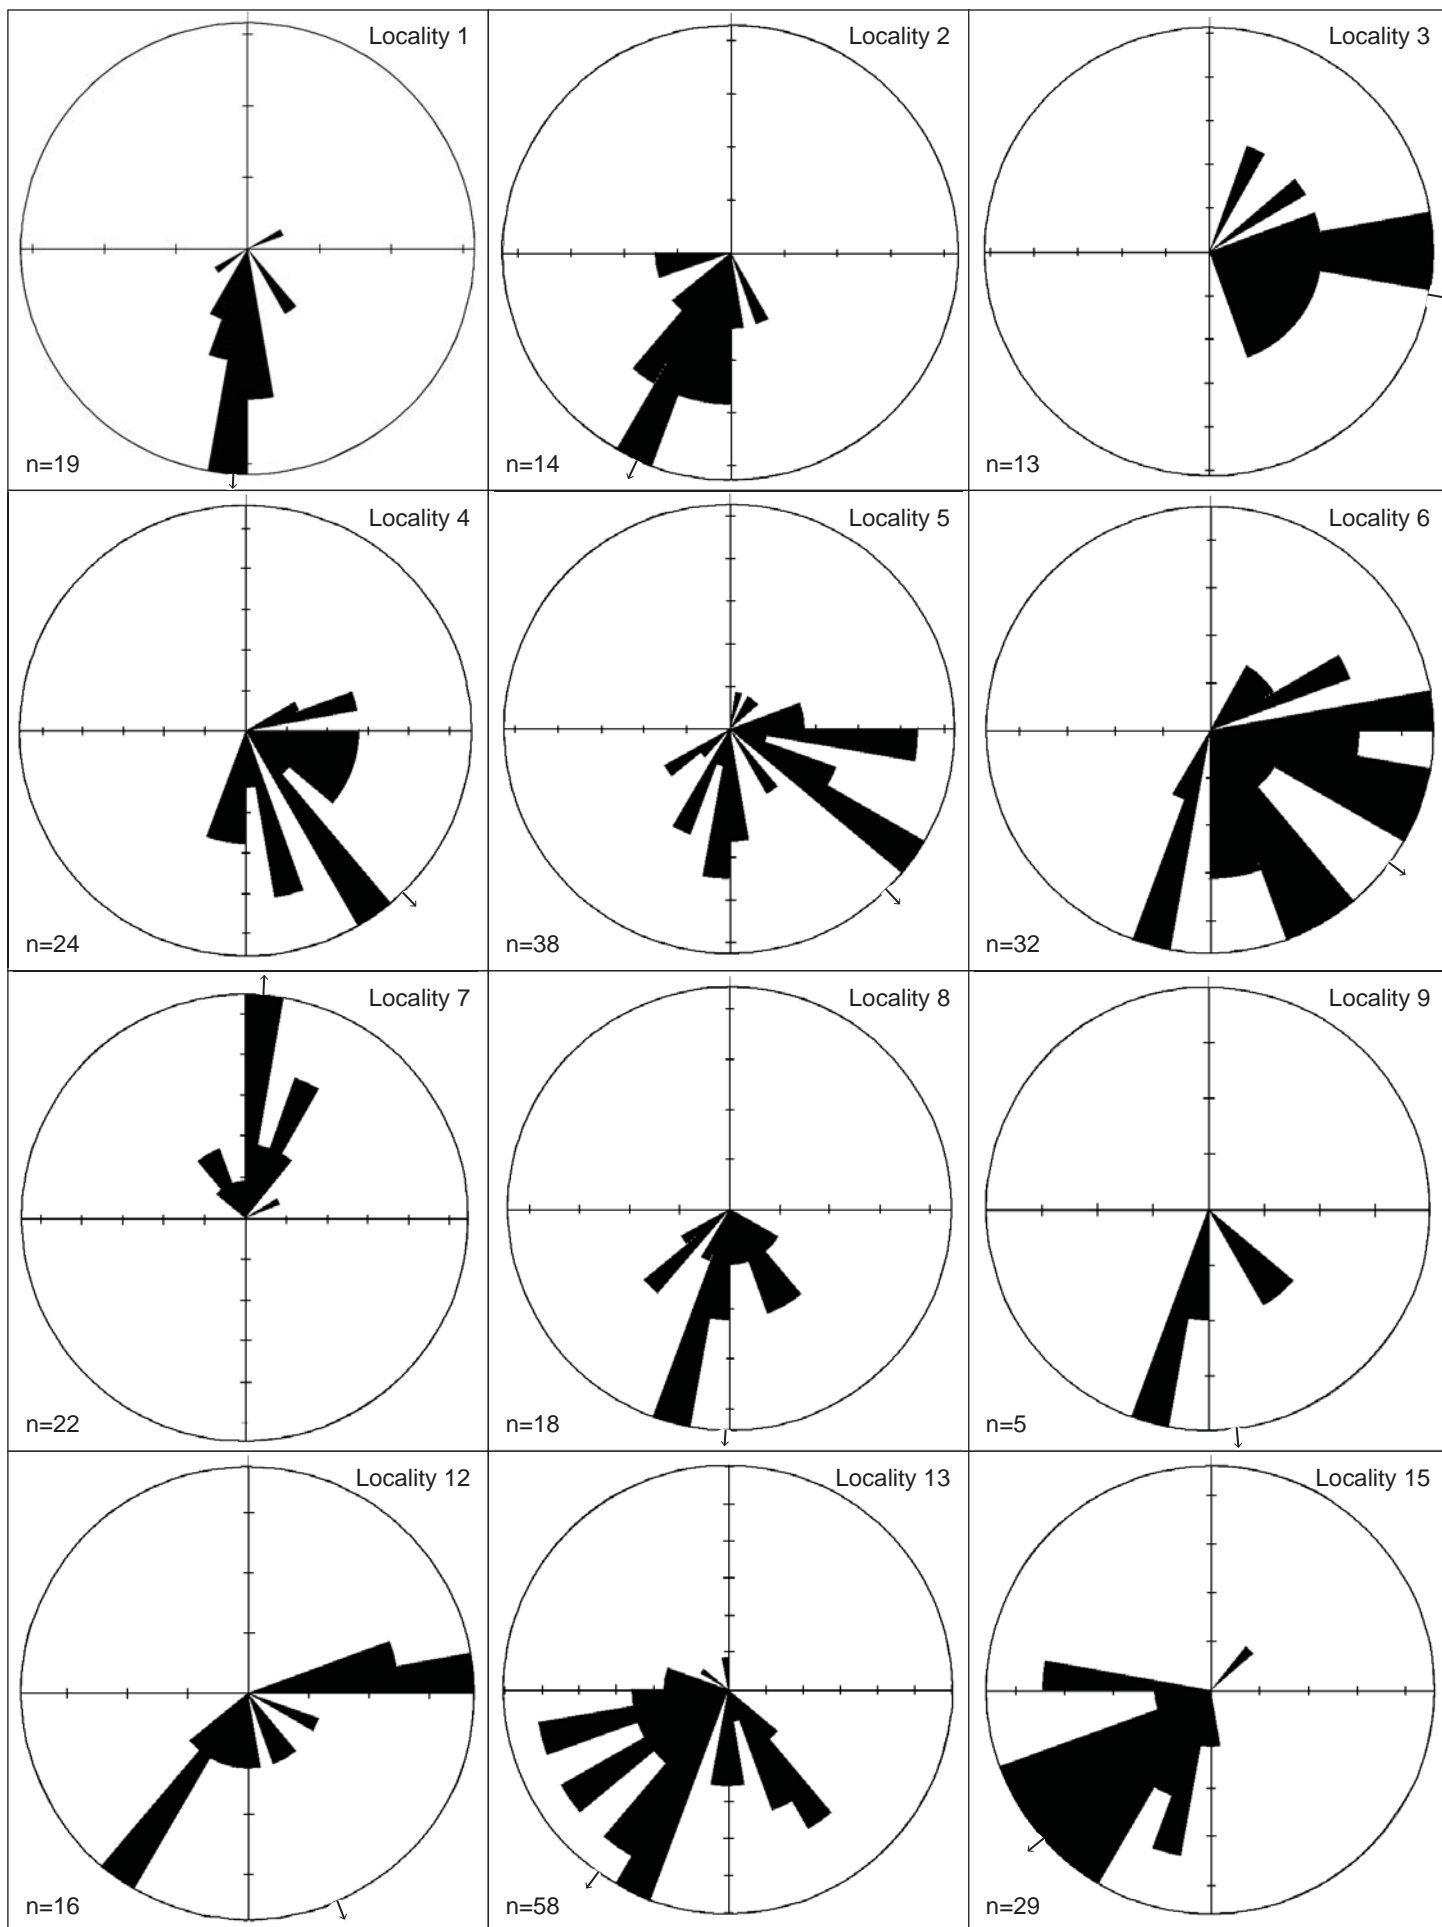

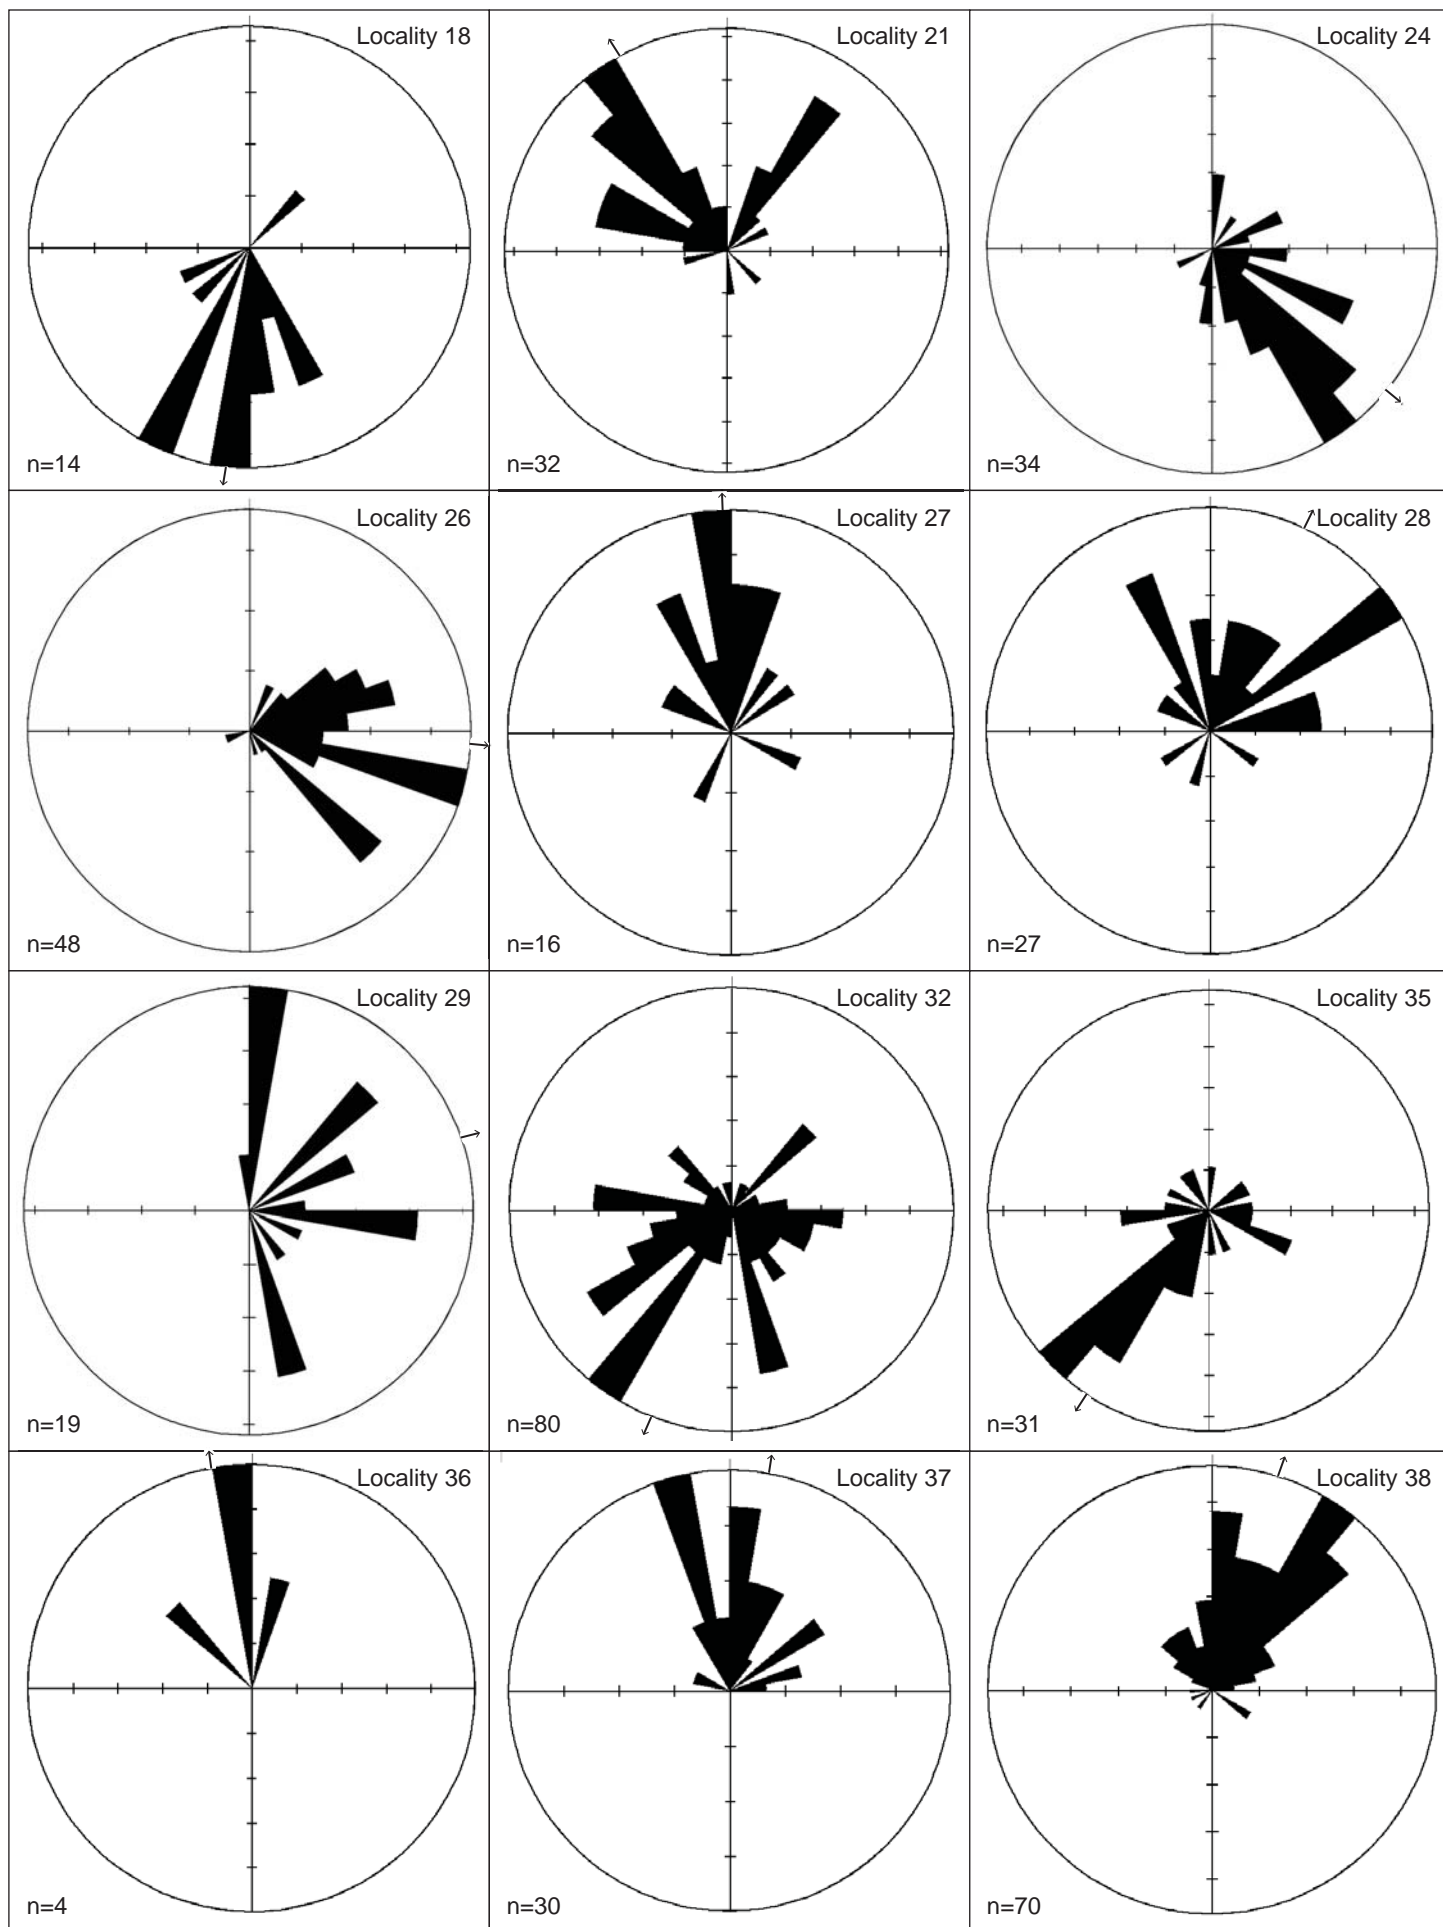

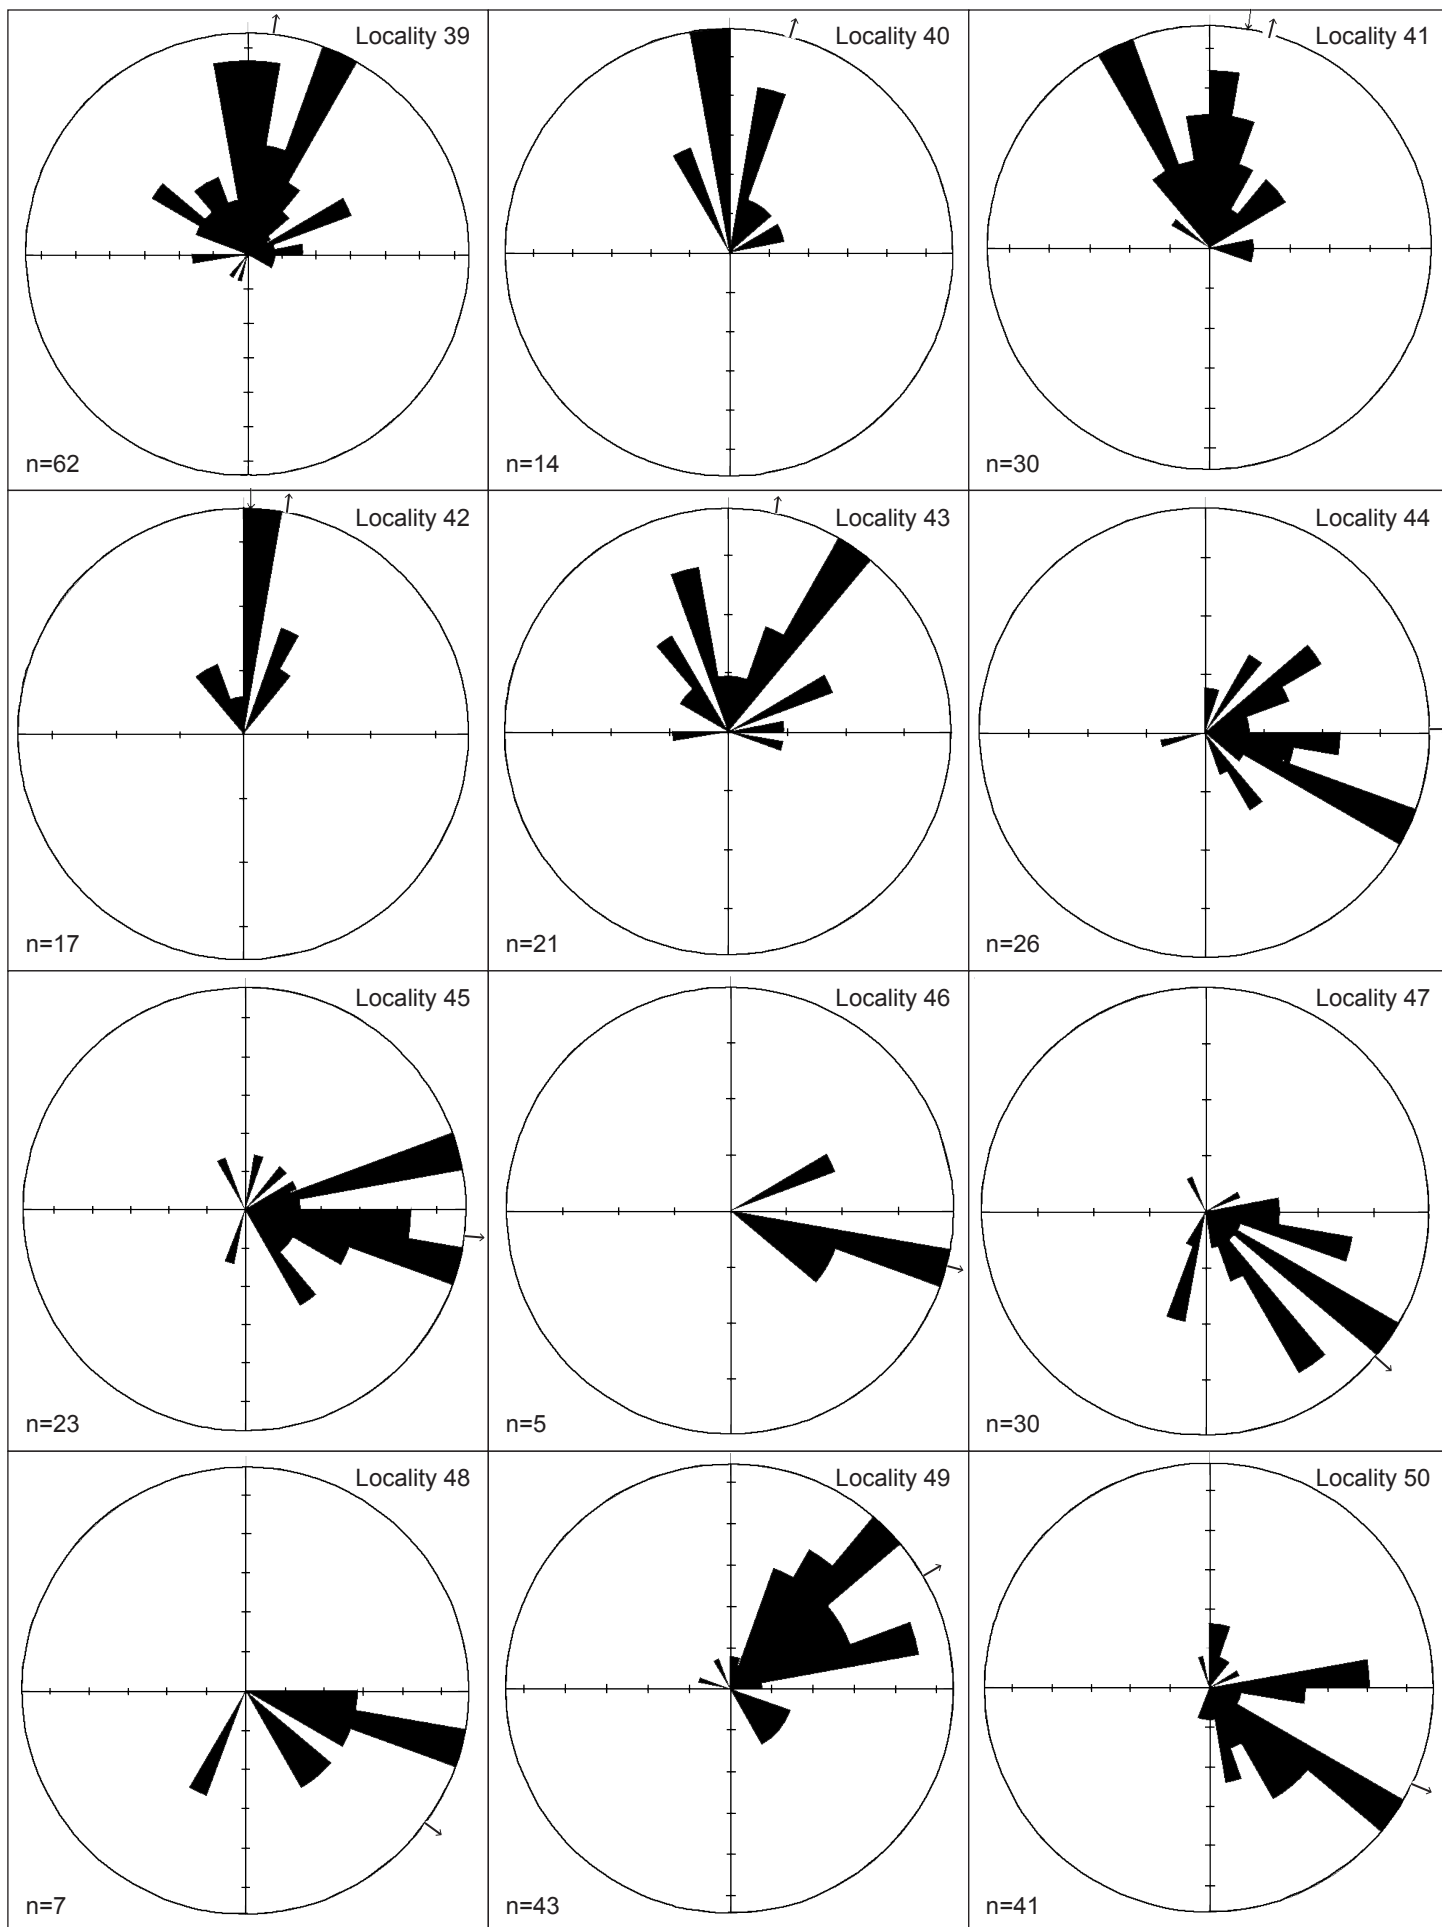

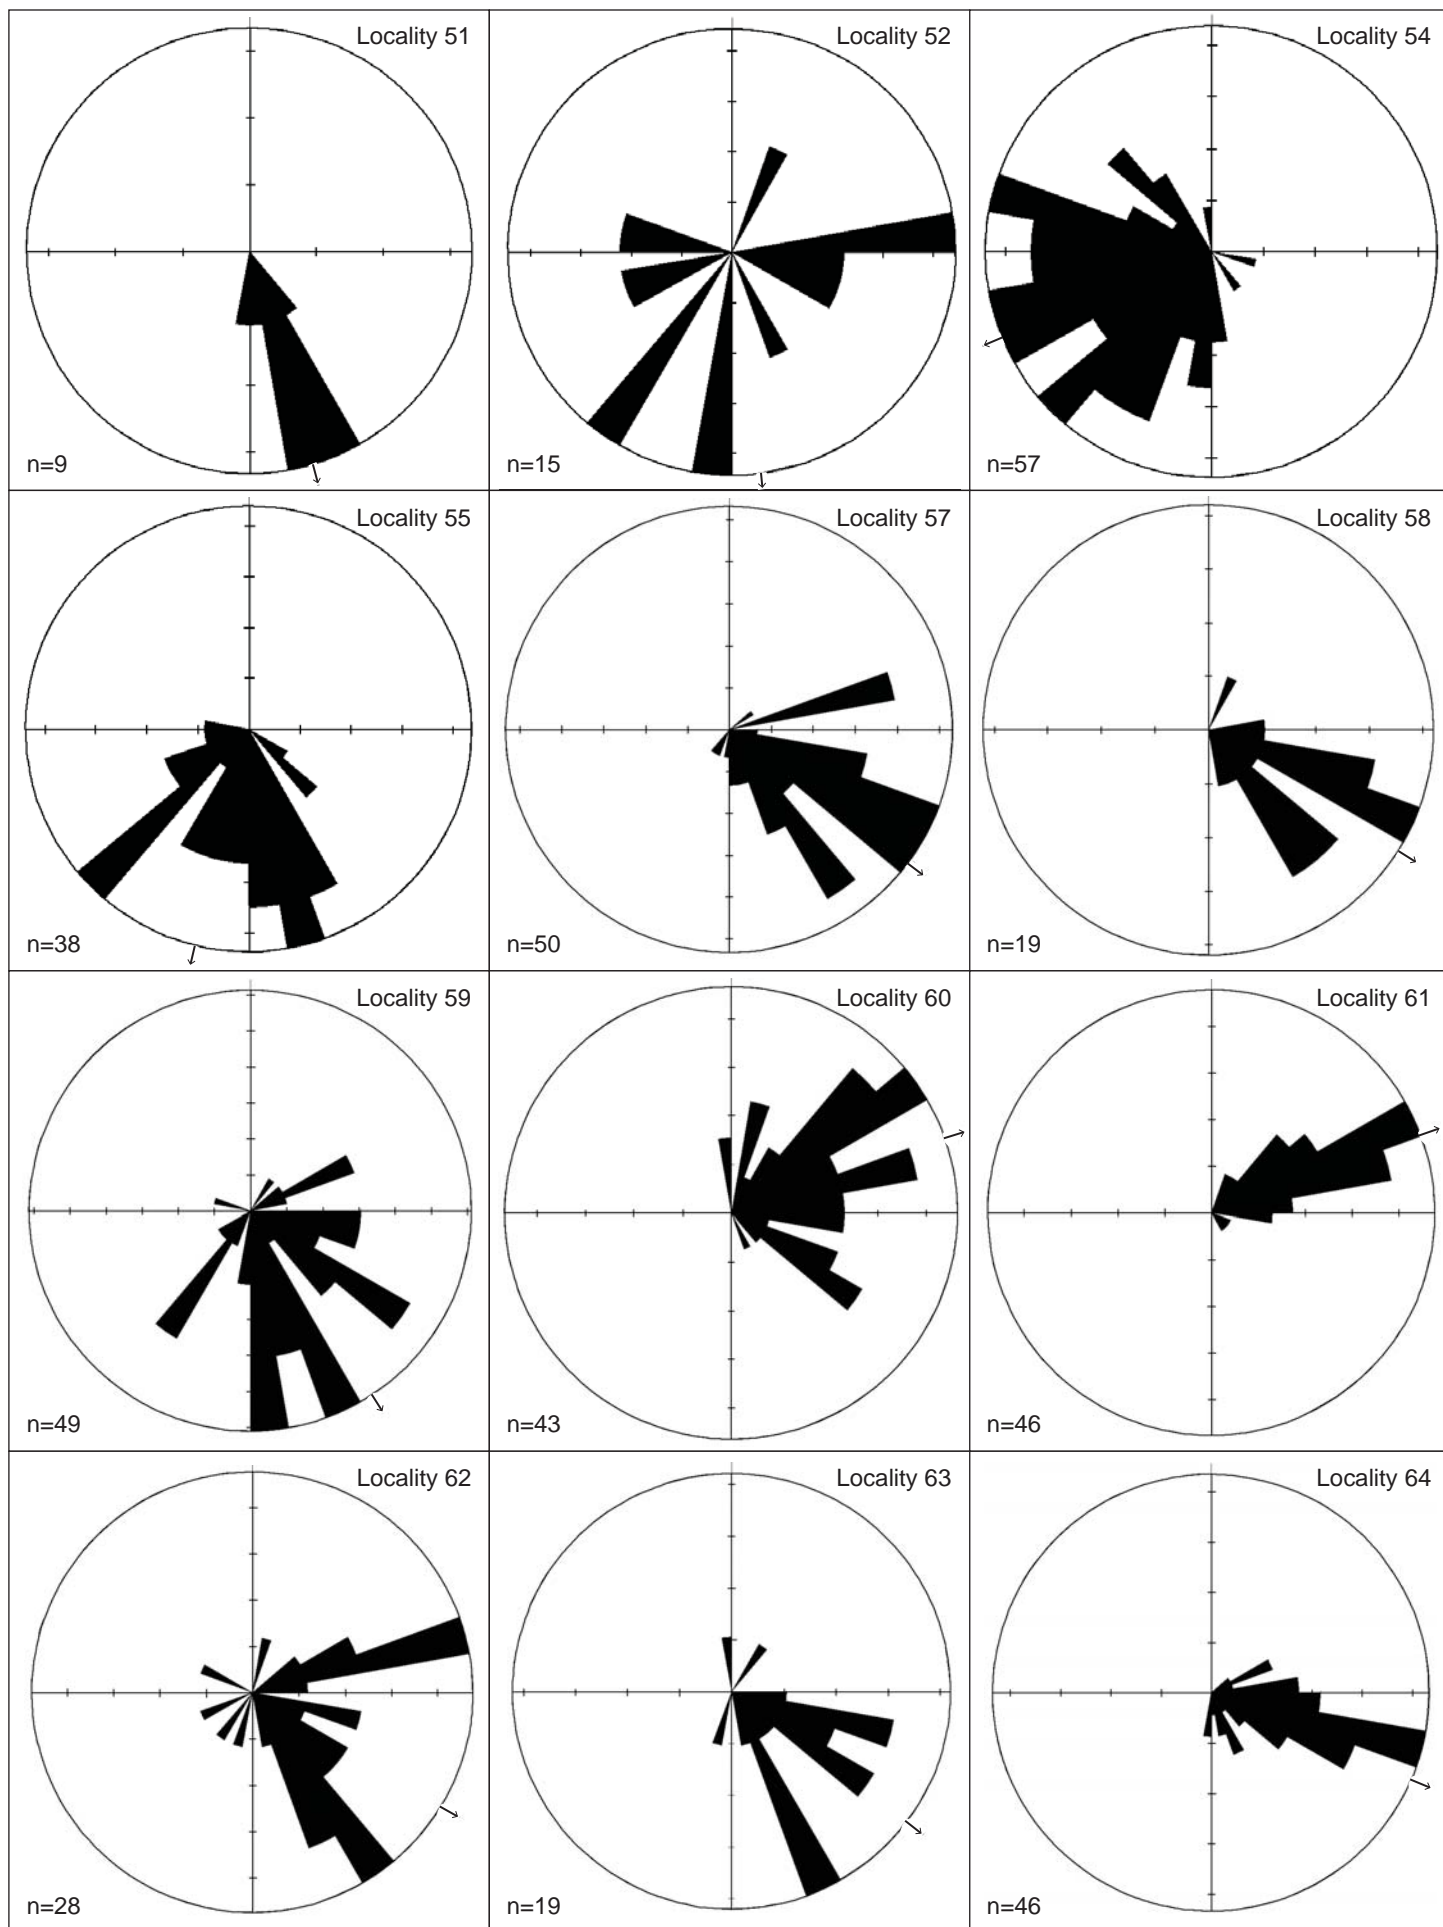

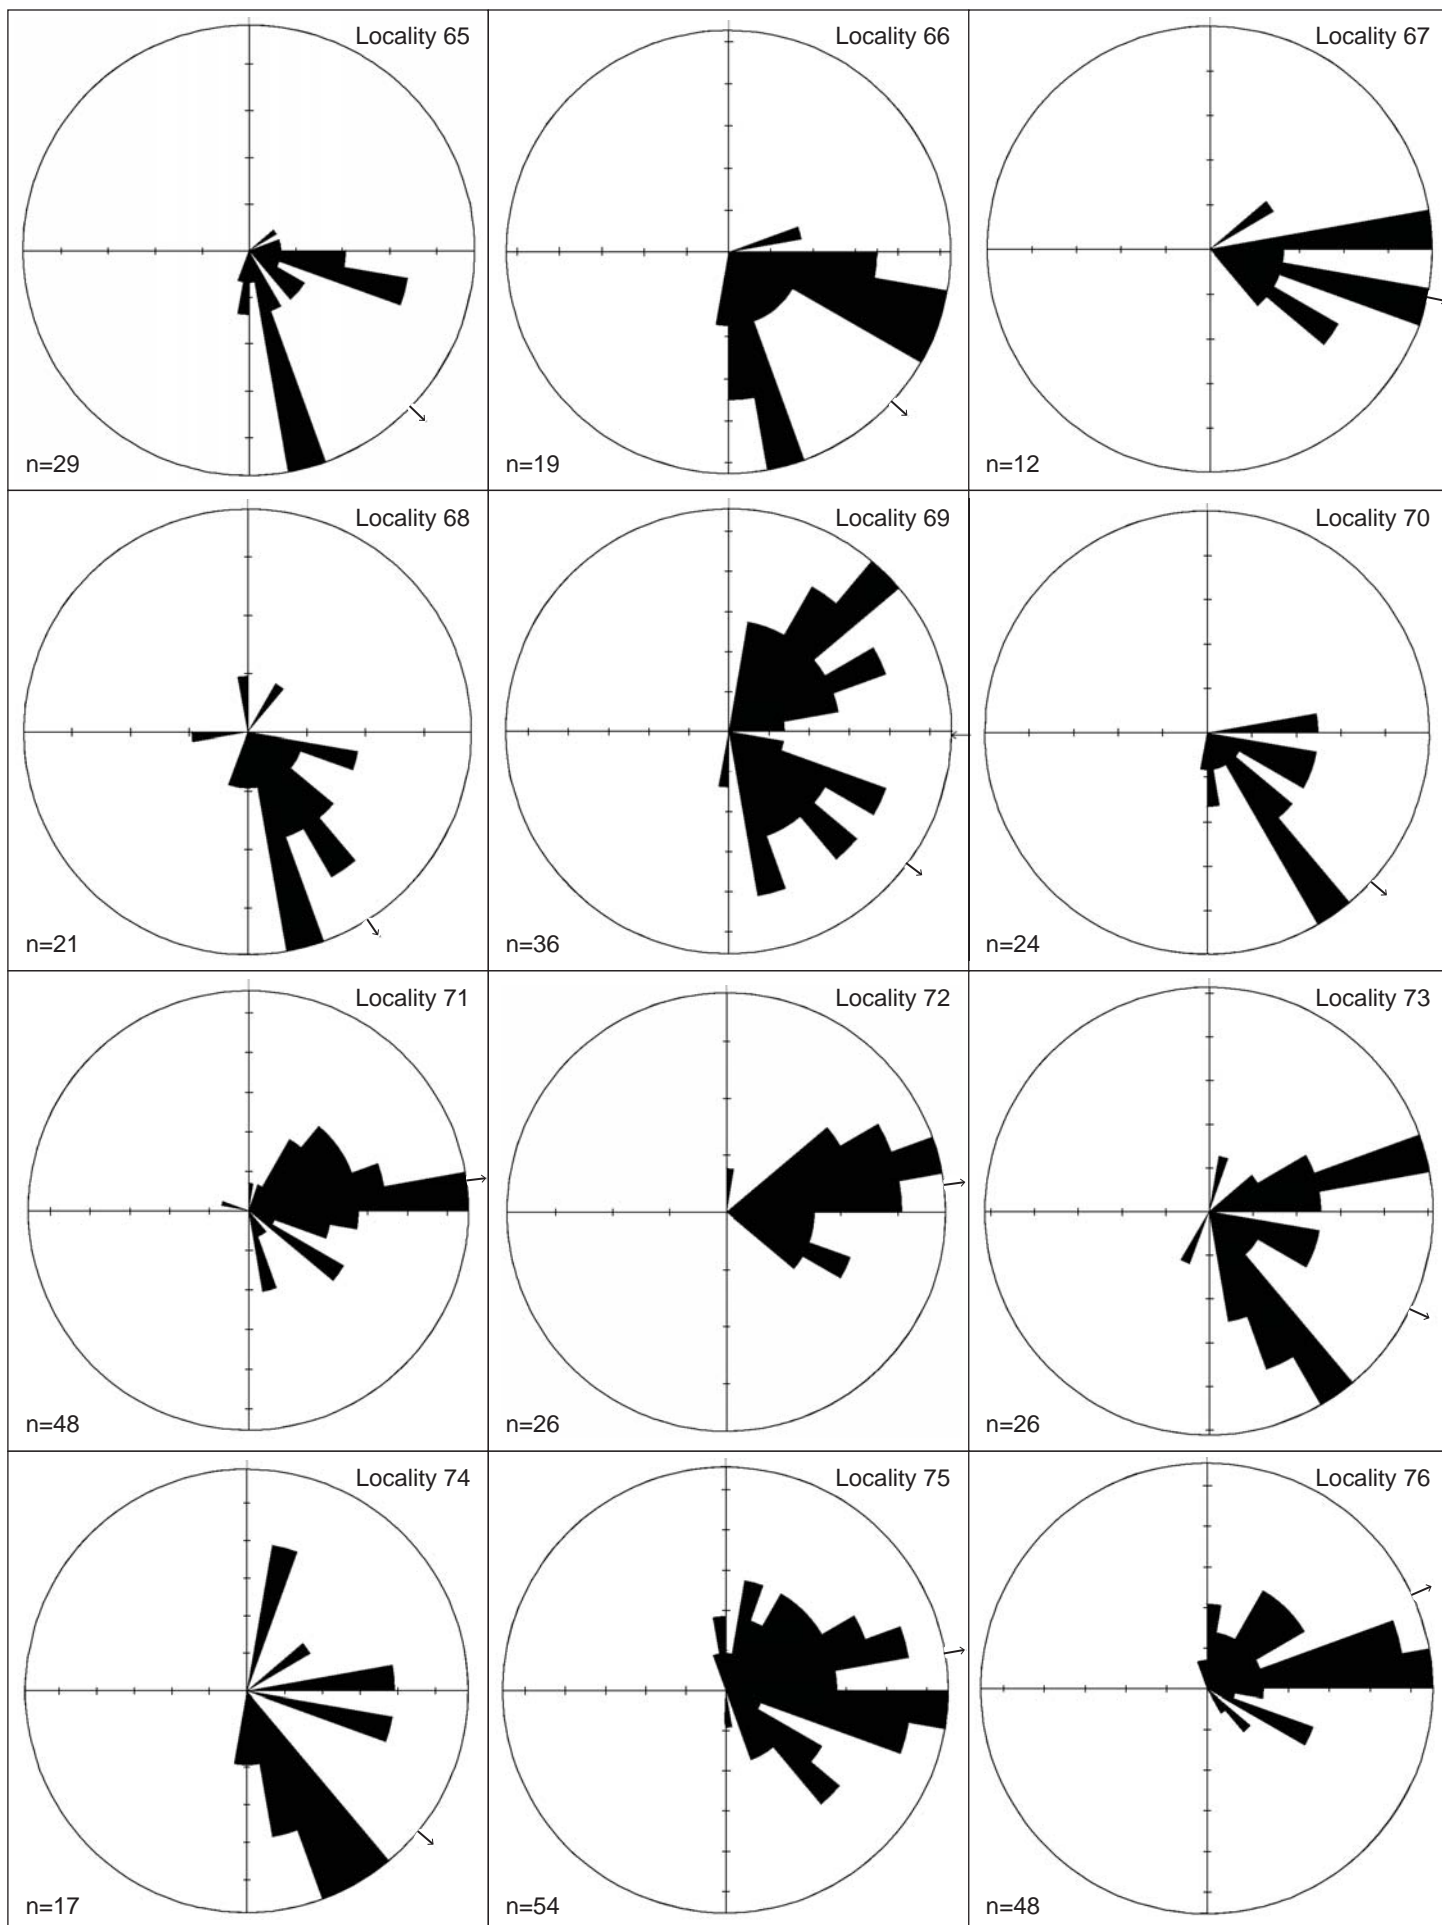

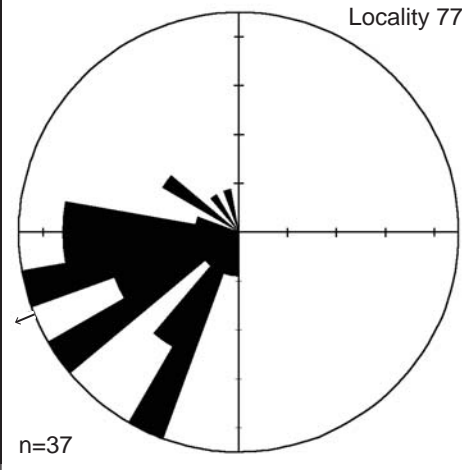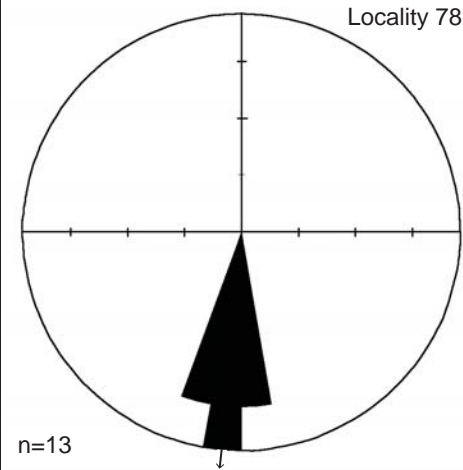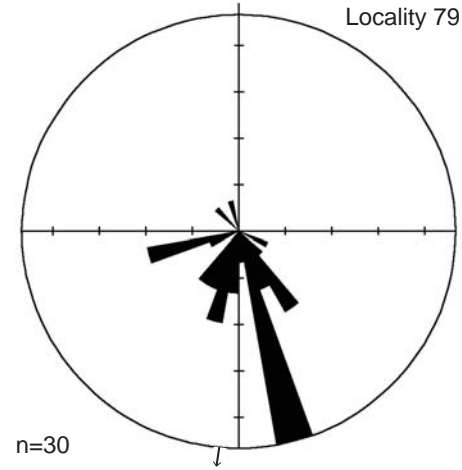

$^{40}\text{Ar}/^{39}\text{Ar}$  supplemental data for:

**Laramide evolution of the San Juan Basin, New Mexico and Colorado:  
Paleocurrent and detrital-sanidine age constraints from the Paleocene  
Nacimiento and Animas formations**

Cather, Steven M.<sup>1</sup>, Heizler, Matthew T.<sup>1</sup>, and Williamson, Thomas E.<sup>2</sup>

<sup>1</sup>New Mexico Bureau of Geology and Mineral Resources, New Mexico Tech, 801 Leroy Pl., Socorro, New Mexico 87801; <sup>2</sup>New Mexico Museum of Natural History and Science, 1801 Mountain Road NW, Albuquerque, New Mexico 87104

Geosphere Ms. No. xxxx

## Analytical Methods and Instrumentation

### Sample preparation and irradiation:

K-feldspar separated by standard magnetic and heavy liquid techniques.

Chosen detrital grains were visibly clear when viewed under a binocular microscope or microtexture free when viewed with a polarizing microscope while immersed in wintergreen oil.

Samples were loaded into machined Al discs and irradiated in multiple packages

at the USGS TRIGA Reactor, Denver, CO.

Neutron flux monitor Fish Canyon Tuff sanidine (FC-2). Assigned age = 28.201 Ma (Kuiper et al., 2008).

Decay constant  $5.463 \times 10^{-10}$  /a (Min et al., 2000).

### Instrumentation:

Thermo-Fisher Scientific ARGUS VI mass spectrometer on line with automated all-metal extraction system.

System = Jan

NM-254

Multi-collector configuration: 40Ar-H1, 39Ar-Ax, 38Ar-L1, 37Ar-L2, 36Ar-L3

Amplification: H1, L1, L2 1E12 Ohm Faraday, AX 1E13 Ohm Faraday, L3 - CDD ion counter, deadtime 14 ns.

NM-277, 284, 289

Multi-collector configuration: 40Ar-H1, 39Ar-Ax, 38Ar-L1, 37Ar-L2, 36Ar-L3

Amplification: H1, AX, L2 1E13 Ohm Faraday, L1 1E14 Ohm Faraday, L3 - CDD ion counter, deadtime 14 ns.

Laser single crystal total fusion.

Samples fused for 30 seconds at 3 W using a 75W Photon-Machines CO2 laser.

Reactive gases removed by 30-150 second reaction with 1 SAES NP-10 getter operated at 1.6 A

and 1 D-50 getter operated at room temperature.

### Analytical parameters:

Mass spectrometer sensitivity =  $5 \times 10^{-17}$  mol/fA

Blank information.

NM-254:  $12 \pm 1\%$ ,  $0.10 \pm 20\%$ ,  $0.03 \pm 200\%$ ,  $0.15 \pm 15\%$ ,  $0.04 \pm 0.7\%$ ,  $\times 10^{-17}$  moles  
for masses 40, 39, 38, 37, 36, respectively.

NM-277:  $5 \pm 7\%$ ,  $0.10 \pm 10\%$ ,  $0.01 \pm 30\%$ ,  $0.09 \pm 8\%$ ,  $0.02 \pm 10\%$ ,  $\times 10^{-17}$  moles  
for masses 40, 39, 38, 37, 36, respectively.

NM-284:  $3 \pm 4\%$ ,  $0.4 \pm 4\%$ ,  $0.03 \pm 25\%$ ,  $0.11 \pm 12\%$ ,  $0.01 \pm 6\%$ ,  $\times 10^{-17}$  moles  
for masses 40, 39, 38, 37, 36, respectively.

NM-289:  $2 \pm 5\%$ ,  $0.15 \pm 6\%$ ,  $0.04 \pm 50\%$ ,  $0.2 \pm 15\%$ ,  $0.02 \pm 1\%$ ,  $\times 10^{-17}$  moles  
for masses 40, 39, 38, 37, 36, respectively.

J-factors determined to a precision of  $\sim \pm 0.01$ - $0.08\%$  by CO<sub>2</sub> laser-fusion of at least 6 single crystals from multiple radial positions around the irradiation tray.

### Irradiation and Correction Factor information.

All sample irradiated at the Triga Reactor, USGS, Denver CO.

|        |                                                                                                                                                                                                                                               |
|--------|-----------------------------------------------------------------------------------------------------------------------------------------------------------------------------------------------------------------------------------------------|
| NM-254 | 40 hours<br>$(^{39}\text{Ar}/^{37}\text{Ar})_{\text{Ca}} = 0.000698 \pm 0.000008$<br>$(^{36}\text{Ar}/^{37}\text{Ar})_{\text{Ca}} = 0.000273 \pm 0.0000002$<br>$(^{40}\text{Ar}/^{39}\text{Ar})_{\text{K}} = 0.008068 \pm 6.8 \times 10^{-5}$ |
| NM-277 | 16 hours<br>$(^{39}\text{Ar}/^{37}\text{Ar})_{\text{Ca}} = 0.0007064 \pm 0.000004$<br>$(^{36}\text{Ar}/^{37}\text{Ar})_{\text{Ca}} = 0.0002731 \pm 0.0000005$<br>$(^{40}\text{Ar}/^{39}\text{Ar})_{\text{K}} = 0.00808 \pm 0.00041$           |
| NM-284 | 16 hours<br>$(^{39}\text{Ar}/^{37}\text{Ar})_{\text{Ca}} = 0.0006946 \pm 0.000017$<br>$(^{36}\text{Ar}/^{37}\text{Ar})_{\text{Ca}} = 0.0002606 \pm 0.0000005$<br>$(^{40}\text{Ar}/^{39}\text{Ar})_{\text{K}} = 0.007531 \pm 0.000105$         |
| NM-289 | 16 hours<br>$(^{39}\text{Ar}/^{37}\text{Ar})_{\text{Ca}} = 0.0006756 \pm 0.000001$<br>$(^{36}\text{Ar}/^{37}\text{Ar})_{\text{Ca}} = 0.000266 \pm 0.0000003$<br>$(^{40}\text{Ar}/^{39}\text{Ar})_{\text{K}} = 0.00812 \pm 0.0001$             |



Argon data for Horseshoe ash sanidine results.

| ID                                                                                                  | Power<br>(watts) | <sup>40</sup> Ar/ <sup>39</sup> Ar<br>(%) | <sup>37</sup> Ar/ <sup>39</sup> Ar<br>(%) | <sup>36</sup> Ar/ <sup>39</sup> Ar<br>(x 10 <sup>-3</sup> ) | <sup>38</sup> Ar/ <sup>39</sup> Ar<br>(x 10 <sup>-15</sup> mol) | K/Ca   | <sup>40</sup> Ar*<br>(%) | Age<br>(Ma) | ±1σ<br>(Ma) |
|-----------------------------------------------------------------------------------------------------|------------------|-------------------------------------------|-------------------------------------------|-------------------------------------------------------------|-----------------------------------------------------------------|--------|--------------------------|-------------|-------------|
| <b>SJ-ASH-2</b> , Sanidine, J=0.0095451±0.08%, IC=1.05594±0.0011243, NM-254C, Lab#=#61400, Argus VI |                  |                                           |                                           |                                                             |                                                                 |        |                          |             |             |
| <b>SJ-ASH-2</b> , Sanidine, J=0.0095368±0.09%, IC=1.05728±0.001084, NM-254C, Lab#=#61401, Argus VI  |                  |                                           |                                           |                                                             |                                                                 |        |                          |             |             |
| 11                                                                                                  | 3                | 5.173                                     | 0.0049                                    | 4.641                                                       | 2.395                                                           | 104.7  | 73.5                     | 65.06       | 0.12        |
| 29                                                                                                  | 3                | 3.819                                     | 0.0022                                    | 0.0534                                                      | 1.118                                                           | 228.2  | 99.6                     | 65.08       | 0.12        |
| 3                                                                                                   | 3                | 3.826                                     | 0.0071                                    | 0.0608                                                      | 1.804                                                           | 71.7   | 99.5                     | 65.166      | 0.051       |
| 9                                                                                                   | 3                | 3.819                                     | 0.0032                                    | 0.0232                                                      | 1.620                                                           | 159.9  | 99.8                     | 65.236      | 0.057       |
| 1                                                                                                   | 3                | 3.840                                     | 0.0030                                    | 0.0886                                                      | 1.209                                                           | 171.5  | 99.3                     | 65.258      | 0.078       |
| 36                                                                                                  | 3                | 3.821                                     | 0.0025                                    | 0.0233                                                      | 1.308                                                           | 201.3  | 99.8                     | 65.268      | 0.097       |
| 17                                                                                                  | 3                | 3.823                                     | 0.0055                                    | 0.0273                                                      | 1.499                                                           | 93.5   | 99.8                     | 65.278      | 0.063       |
| 27                                                                                                  | 3                | 3.822                                     | 0.0050                                    | 0.0123                                                      | 1.302                                                           | 101.2  | 99.9                     | 65.337      | 0.070       |
| 18                                                                                                  | 3                | 3.823                                     | 0.0049                                    | 0.0177                                                      | 1.208                                                           | 104.6  | 99.9                     | 65.338      | 0.074       |
| 10                                                                                                  | 3                | 3.821                                     | 0.0038                                    | 0.0096                                                      | 1.688                                                           | 133.8  | 99.9                     | 65.340      | 0.053       |
| 19                                                                                                  | 3                | 3.823                                     | 0.0048                                    | 0.0162                                                      | 1.738                                                           | 106.8  | 99.9                     | 65.348      | 0.051       |
| 23                                                                                                  | 3                | 3.874                                     | 0.0030                                    | 0.1858                                                      | 0.859                                                           | 169.3  | 98.6                     | 65.36       | 0.12        |
| 34                                                                                                  | 3                | 3.815                                     | 0.0025                                    | -0.0169                                                     | 1.316                                                           | 204.0  | 100.1                    | 65.359      | 0.097       |
| 12                                                                                                  | 3                | 4.136                                     | 0.0348                                    | 1.078                                                       | 1.354                                                           | 14.7   | 92.4                     | 65.378      | 0.098       |
| 38                                                                                                  | 3                | 3.827                                     | 0.0044                                    | 0.0201                                                      | 1.558                                                           | 116.5  | 99.9                     | 65.380      | 0.082       |
| 2                                                                                                   | 3                | 3.829                                     | 0.0046                                    | 0.0281                                                      | 1.341                                                           | 111.7  | 99.8                     | 65.389      | 0.068       |
| 16                                                                                                  | 3                | 3.821                                     | 0.0089                                    | 0.0110                                                      | 0.516                                                           | 57.6   | 99.9                     | 65.39       | 0.24        |
| 41                                                                                                  | 3                | 3.828                                     | 0.0041                                    | 0.0157                                                      | 1.926                                                           | 125.7  | 99.9                     | 65.432      | 0.069       |
| 4                                                                                                   | 3                | 3.842                                     | 0.0041                                    | 0.0610                                                      | 1.071                                                           | 123.9  | 99.5                     | 65.445      | 0.087       |
| 13                                                                                                  | 3                | 3.825                                     | 0.0044                                    | 0.0093                                                      | 1.163                                                           | 116.5  | 99.9                     | 65.46       | 0.10        |
| 16                                                                                                  | 3                | 3.839                                     | 0.0030                                    | 0.0451                                                      | 1.466                                                           | 172.2  | 99.7                     | 65.460      | 0.065       |
| 23                                                                                                  | 3                | 3.832                                     | 0.0074                                    | 0.0332                                                      | 0.579                                                           | 69.1   | 99.8                     | 65.46       | 0.22        |
| 35                                                                                                  | 3                | 3.829                                     | 0.0055                                    | 0.0093                                                      | 1.616                                                           | 92.0   | 99.9                     | 65.469      | 0.078       |
| 20                                                                                                  | 3                | 3.830                                     | 0.0060                                    | 0.0253                                                      | 1.304                                                           | 85.2   | 99.8                     | 65.472      | 0.098       |
| 01                                                                                                  | 3                | 3.826                                     | 0.0044                                    | 0.0084                                                      | 1.512                                                           | 116.6  | 99.9                     | 65.480      | 0.082       |
| 25                                                                                                  | 3                | 3.890                                     | -0.0161                                   | 0.2101                                                      | 0.135                                                           | -      | 98.4                     | 65.48       | 0.60        |
| 20                                                                                                  | 3                | 3.834                                     | 0.0015                                    | 0.0211                                                      | 1.173                                                           | 338.7  | 99.8                     | 65.489      | 0.075       |
| 30                                                                                                  | 3                | 3.834                                     | 0.0058                                    | 0.0228                                                      | 1.538                                                           | 87.4   | 99.8                     | 65.490      | 0.082       |
| 39                                                                                                  | 3                | 3.832                                     | 0.0037                                    | 0.0163                                                      | 2.213                                                           | 137.7  | 99.9                     | 65.493      | 0.060       |
| 33                                                                                                  | 3                | 3.834                                     | 0.0056                                    | 0.0232                                                      | 1.633                                                           | 90.7   | 99.8                     | 65.496      | 0.079       |
| 14                                                                                                  | 3                | 3.828                                     | 0.0061                                    | 0.0005                                                      | 1.621                                                           | 83.8   | 100.0                    | 65.504      | 0.059       |
| 31                                                                                                  | 3                | 3.834                                     | 0.0021                                    | 0.0185                                                      | 1.286                                                           | 239.0  | 99.9                     | 65.512      | 0.099       |
| 6                                                                                                   | 3                | 3.856                                     | 0.0003                                    | 0.0837                                                      | 0.778                                                           | 1692.8 | 99.4                     | 65.55       | 0.12        |
| 12                                                                                                  | 3                | 3.848                                     | 0.0024                                    | 0.0670                                                      | 1.230                                                           | 215.2  | 99.5                     | 65.57       | 0.10        |
| 10                                                                                                  | 3                | 3.839                                     | 0.0052                                    | 0.0356                                                      | 0.866                                                           | 98.8   | 99.7                     | 65.57       | 0.14        |
| 22                                                                                                  | 3                | 3.833                                     | 0.0034                                    | 0.0042                                                      | 1.025                                                           | 151.6  | 100.0                    | 65.572      | 0.088       |
| 7                                                                                                   | 3                | 3.848                                     | 0.0040                                    | 0.0524                                                      | 1.405                                                           | 127.4  | 99.6                     | 65.577      | 0.072       |
| 40                                                                                                  | 3                | 3.837                                     | 0.0040                                    | 0.0150                                                      | 2.559                                                           | 127.7  | 99.9                     | 65.580      | 0.052       |
| 8                                                                                                   | 3                | 3.838                                     | 0.0044                                    | 0.0170                                                      | 2.149                                                           | 115.9  | 99.9                     | 65.583      | 0.045       |
| 21                                                                                                  | 3                | 3.844                                     | 0.0057                                    | 0.0354                                                      | 0.905                                                           | 89.7   | 99.7                     | 65.603      | 0.099       |
| 21                                                                                                  | 3                | 3.850                                     | 0.0059                                    | 0.0603                                                      | 1.341                                                           | 86.8   | 99.5                     | 65.635      | 0.097       |
| 04                                                                                                  | 3                | 3.838                                     | 0.0055                                    | 0.0164                                                      | 0.708                                                           | 92.3   | 99.9                     | 65.64       | 0.17        |
| 06                                                                                                  | 3                | 3.853                                     | 0.0048                                    | 0.0653                                                      | 1.478                                                           | 105.5  | 99.5                     | 65.658      | 0.084       |
| 19                                                                                                  | 3                | 3.847                                     | 0.0097                                    | 0.0438                                                      | 1.032                                                           | 52.6   | 99.7                     | 65.68       | 0.12        |
| 02                                                                                                  | 3                | 3.845                                     | 0.0039                                    | 0.0279                                                      | 1.380                                                           | 129.7  | 99.8                     | 65.706      | 0.090       |
| 15                                                                                                  | 3                | 3.837                                     | 0.0057                                    | -0.0002                                                     | 0.893                                                           | 90.1   | 100.0                    | 65.71       | 0.13        |
| 24                                                                                                  | 3                | 3.848                                     | 0.0037                                    | 0.0250                                                      | 1.427                                                           | 138.7  | 99.8                     | 65.724      | 0.063       |
| 08                                                                                                  | 3                | 3.839                                     | 0.0042                                    | -0.0023                                                     | 1.913                                                           | 121.9  | 100.0                    | 65.758      | 0.066       |
| 37                                                                                                  | 3                | 3.873                                     | 0.0015                                    | 0.1019                                                      | 1.069                                                           | 329.5  | 99.2                     | 65.76       | 0.12        |
| 05                                                                                                  | 3                | 3.848                                     | 0.0065                                    | 0.0266                                                      | 1.128                                                           | 79.0   | 99.8                     | 65.76       | 0.11        |
| 28                                                                                                  | 3                | 3.852                                     | 0.0042                                    | 0.0279                                                      | 1.592                                                           | 121.5  | 99.8                     | 65.765      | 0.084       |
| 09                                                                                                  | 3                | 3.849                                     | 0.0033                                    | 0.0273                                                      | 0.947                                                           | 156.6  | 99.8                     | 65.77       | 0.13        |
| 17                                                                                                  | 3                | 3.850                                     | 0.0064                                    | 0.0265                                                      | 1.409                                                           | 79.7   | 99.8                     | 65.799      | 0.090       |
| 14                                                                                                  | 3                | 3.853                                     | 0.0060                                    | 0.0351                                                      | 0.739                                                           | 84.4   | 99.7                     | 65.81       | 0.17        |
| 15                                                                                                  | 3                | 3.862                                     | 0.0013                                    | 0.0481                                                      | 1.255                                                           | 383.7  | 99.6                     | 65.834      | 0.072       |
| 11                                                                                                  | 3                | 3.852                                     | 0.0071                                    | 0.0236                                                      | 0.356                                                           | 72.2   | 99.8                     | 65.85       | 0.34        |
| 18                                                                                                  | 3                | 3.857                                     | 0.0087                                    | 0.0353                                                      | 0.544                                                           | 58.4   | 99.7                     | 65.88       | 0.23        |
| 26                                                                                                  | 3                | 3.850                                     | 0.0015                                    | -0.0026                                                     | 0.970                                                           | 329.3  | 100.0                    | 65.885      | 0.093       |
| x 03                                                                                                | 3                | 3.866                                     | 0.0044                                    | 0.0281                                                      | 0.315                                                           | 117.0  | 99.8                     | 66.05       | 0.38        |
| x 5                                                                                                 | 3                | 3.906                                     | 0.0035                                    | 0.0843                                                      | 2.107                                                           | 143.9  | 99.4                     | 66.402      | 0.049       |
| x 32                                                                                                | 3                | 3.891                                     | 0.0034                                    | 0.0308                                                      | 1.991                                                           | 150.1  | 99.8                     | 66.417      | 0.066       |
| <b>Mean age ± 1σ</b>                                                                                |                  |                                           |                                           | n=58                                                        | MSWD=5.13                                                       |        |                          | 65.49       | 0.06        |

**Notes:**  
Isotopic ratios corrected for blank, radioactive decay, and mass discrimination, not corrected for interfering reactions.  
Errors quoted for individual analyses include analytical error only, without interfering reaction or J uncertainties.  
Mean age is weighted mean age of Taylor (1982). Mean age error is weighted error of the mean (Taylor, 1982), multiplied by the root of the MSWD where MSWD>1, and also incorporates uncertainty in J factors and irradiation correction uncertainties.  
Isotopic abundances after Steiger and Jäger (1977).  
\*-, K/Ca not determined due to non-detectable <sup>37</sup>Ar above blank level  
x preceding sample ID denotes analyses excluded from mean age calculations.  
IC = measured <sup>40</sup>Ar/<sup>36</sup>Ar of air standard divided by 295.5  
Ages calculated relative to FC-2 Fish Canyon Tuff sanidine interlaboratory standard at 28.201 Ma (Kuiper et al., 2008)  
Decay Constant (LambdaK (total)) = 5.463e-10/a (Min et al., 2000)

Argon data for Wirt member samples.

| ID                                                                                                                                          | Power   | $^{40}\text{Ar}/^{39}\text{Ar}$ | $^{37}\text{Ar}/^{39}\text{Ar}$ | $^{36}\text{Ar}/^{39}\text{Ar}$ | $^{39}\text{Ar}_K$       | K/Ca  | $^{40}\text{Ar}^*$ | Age    | $\pm 1\sigma$ |
|---------------------------------------------------------------------------------------------------------------------------------------------|---------|---------------------------------|---------------------------------|---------------------------------|--------------------------|-------|--------------------|--------|---------------|
|                                                                                                                                             | (watts) |                                 |                                 | ( $\times 10^{-3}$ )            | ( $\times 10^{-15}$ mol) |       | (%)                | (Ma)   | (Ma)          |
| <b>6-2-15-A, Sanidine/Microcline, J=0.003821<math>\pm</math>0.03%, IC=1.029837<math>\pm</math>0.0011228, NM-277G, Lab#=63811, Argus VI</b>  |         |                                 |                                 |                                 |                          |       |                    |        |               |
| 43                                                                                                                                          | 3       | 11.00                           | 0.0042                          | 0.2988                          | 0.350                    | 120.3 | 99.2               | 74.72  | 0.18          |
| 21                                                                                                                                          | 3       | 23.20                           | 0.0049                          | 0.6353                          | 0.203                    | 103.8 | 99.2               | 154.2  | 1.3           |
| 62                                                                                                                                          | 3       | 25.19                           | -0.0025                         | 0.2465                          | 0.734                    | -     | 99.7               | 167.71 | 0.37          |
| 75                                                                                                                                          | 3       | 26.23                           | 0.0104                          | 1.824                           | 0.212                    | 49.1  | 97.9               | 171.3  | 1.2           |
| 24                                                                                                                                          | 3       | 26.69                           | 0.0030                          | 0.2391                          | 0.477                    | 168.8 | 99.7               | 177.24 | 0.68          |
| 07                                                                                                                                          | 3       | 28.16                           | -0.0008                         | 0.4927                          | 0.396                    | -     | 99.5               | 186.10 | 0.64          |
| 28                                                                                                                                          | 3       | 28.38                           | -0.0024                         | 0.4290                          | 0.344                    | -     | 99.6               | 187.62 | 0.87          |
| 16                                                                                                                                          | 3       | 29.00                           | 0.0046                          | 0.4507                          | 0.282                    | 112.1 | 99.5               | 191.49 | 0.98          |
| 36                                                                                                                                          | 3       | 28.99                           | 0.0012                          | 0.3118                          | 0.770                    | 418.8 | 99.7               | 191.67 | 0.44          |
| 69                                                                                                                                          | 3       | 29.18                           | 0.0036                          | 0.8320                          | 0.145                    | 142.1 | 99.2               | 191.9  | 2.2           |
| 72                                                                                                                                          | 3       | 29.34                           | 0.0013                          | 1.163                           | 0.429                    | 378.9 | 98.8               | 192.29 | 0.85          |
| 13                                                                                                                                          | 3       | 29.18                           | 0.0005                          | 0.1456                          | 0.721                    | 954.4 | 99.9               | 193.16 | 0.42          |
| 02                                                                                                                                          | 3       | 29.38                           | 0.0026                          | 0.3292                          | 0.505                    | 192.9 | 99.7               | 194.12 | 0.65          |
| 15                                                                                                                                          | 3       | 29.52                           | 0.0015                          | 0.6619                          | 0.406                    | 339.4 | 99.3               | 194.36 | 0.81          |
| 01                                                                                                                                          | 3       | 29.46                           | -0.0016                         | 0.2876                          | 0.533                    | -     | 99.7               | 194.66 | 0.54          |
| 45                                                                                                                                          | 3       | 31.08                           | -0.0039                         | 0.5662                          | 0.369                    | -     | 99.5               | 204.33 | 0.89          |
| 34                                                                                                                                          | 3       | 40.87                           | 0.0048                          | 0.1134                          | 0.925                    | 105.6 | 99.9               | 265.36 | 0.49          |
| 06                                                                                                                                          | 3       | 46.40                           | -0.0013                         | 0.2885                          | 0.410                    | -     | 99.8               | 298.23 | 0.96          |
| 20                                                                                                                                          | 3       | 48.94                           | -0.0003                         | 0.2843                          | 0.551                    | -     | 99.8               | 313.27 | 0.86          |
| 56                                                                                                                                          | 3       | 52.14                           | -0.0044                         | 0.6719                          | 0.294                    | -     | 99.6               | 331.3  | 1.5           |
| 47                                                                                                                                          | 3       | 59.30                           | 0.0015                          | 0.3431                          | 0.524                    | 330.6 | 99.8               | 373.2  | 1.1           |
| 09                                                                                                                                          | 3       | 69.27                           | 0.0007                          | 0.2931                          | 0.715                    | 755.2 | 99.9               | 429.29 | 0.93          |
| 61                                                                                                                                          | 3       | 75.96                           | -0.0014                         | 0.3458                          | 0.340                    | -     | 99.9               | 465.9  | 2.3           |
| 25                                                                                                                                          | 3       | 86.11                           | 0.0017                          | 0.3072                          | 0.471                    | 303.9 | 99.9               | 520.2  | 1.4           |
| 49                                                                                                                                          | 3       | 107.1                           | 0.0047                          | 0.2321                          | 0.384                    | 108.5 | 99.9               | 627.4  | 2.3           |
| 11                                                                                                                                          | 3       | 136.0                           | 0.0006                          | 0.3354                          | 0.404                    | 894.6 | 99.9               | 765.5  | 2.6           |
| 67                                                                                                                                          | 3       | 139.6                           | -0.0017                         | 0.5381                          | 0.370                    | -     | 99.9               | 781.9  | 2.6           |
| 44                                                                                                                                          | 3       | 147.8                           | 0.0012                          | 0.2037                          | 0.655                    | 441.7 | 100.0              | 819.1  | 1.6           |
| 40                                                                                                                                          | 3       | 174.0                           | 0.0028                          | 0.4073                          | 0.358                    | 182.2 | 99.9               | 932.4  | 3.2           |
| 60                                                                                                                                          | 3       | 207.9                           | 0.0008                          | 0.2648                          | 0.433                    | 639.1 | 100.0              | 1069.9 | 2.8           |
| 65                                                                                                                                          | 3       | 215.6                           | 0.0079                          | 0.7654                          | 0.265                    | 64.2  | 99.9               | 1099.0 | 4.8           |
| 26                                                                                                                                          | 3       | 216.9                           | 0.0168                          | 1.756                           | 0.157                    | 30.4  | 99.8               | 1103.1 | 9.5           |
| 52                                                                                                                                          | 3       | 256.4                           | -0.0019                         | 0.6120                          | 0.248                    | -     | 99.9               | 1249.4 | 5.9           |
| 70                                                                                                                                          | 3       | 261.6                           | -0.0039                         | 0.5888                          | 0.302                    | -     | 99.9               | 1267.8 | 4.9           |
| 35                                                                                                                                          | 3       | 265.5                           | 0.0018                          | 0.5800                          | 0.419                    | 285.9 | 99.9               | 1281.3 | 3.1           |
| <b>6-2-15-B, Sanidine/Microcline, J=0.0038183<math>\pm</math>0.03%, IC=1.029837<math>\pm</math>0.0011228, NM-277G, Lab#=63813, Argus VI</b> |         |                                 |                                 |                                 |                          |       |                    |        |               |
| 67                                                                                                                                          | 3       | 9.569                           | 0.0048                          | 0.2587                          | 0.405                    | 106.7 | 99.2               | 65.12  | 0.14          |
| 55                                                                                                                                          | 3       | 9.646                           | 0.0061                          | 0.0726                          | 0.817                    | 83.4  | 99.8               | 66.014 | 0.073         |
| 35                                                                                                                                          | 3       | 9.765                           | 0.0079                          | 0.3130                          | 0.859                    | 64.4  | 99.1               | 66.339 | 0.073         |
| 63                                                                                                                                          | 3       | 9.745                           | 0.0092                          | 0.1448                          | 0.616                    | 55.5  | 99.6               | 66.540 | 0.098         |
| 57                                                                                                                                          | 3       | 9.968                           | 0.0067                          | 0.4757                          | 0.822                    | 75.7  | 98.6               | 67.383 | 0.077         |
| 30                                                                                                                                          | 3       | 11.43                           | 0.0011                          | 2.740                           | 0.038                    | 453.3 | 92.9               | 72.7   | 1.5           |
| 38                                                                                                                                          | 3       | 10.72                           | 0.0045                          | 0.0880                          | 0.752                    | 114.5 | 99.8               | 73.193 | 0.085         |
| 56                                                                                                                                          | 3       | 11.26                           | 0.0062                          | 0.1141                          | 0.838                    | 82.9  | 99.7               | 76.772 | 0.077         |
| 69                                                                                                                                          | 3       | 12.74                           | 0.0021                          | 0.3211                          | 0.175                    | 239.8 | 99.3               | 86.29  | 0.37          |
| 08                                                                                                                                          | 3       | 22.97                           | 0.0015                          | 0.2633                          | 1.441                    | 333.7 | 99.7               | 153.37 | 0.22          |
| 20                                                                                                                                          | 3       | 24.64                           | 0.0034                          | 0.4925                          | 0.584                    | 150.7 | 99.4               | 163.60 | 0.50          |
| 10                                                                                                                                          | 3       | 40.32                           | -0.0064                         | 0.3625                          | 0.178                    | -     | 99.7               | 261.4  | 2.1           |
| 09                                                                                                                                          | 3       | 44.59                           | -0.0035                         | 0.6331                          | 0.148                    | -     | 99.6               | 286.6  | 2.8           |
| 52                                                                                                                                          | 3       | 112.1                           | -0.0008                         | 0.4664                          | 0.354                    | -     | 99.9               | 651.5  | 2.3           |
| 45                                                                                                                                          | 3       | 159.1                           | 0.0041                          | 1.044                           | 0.131                    | 123.1 | 99.8               | 867.5  | 8.2           |
| 64                                                                                                                                          | 3       | 159.6                           | 0.0024                          | 0.4322                          | 0.561                    | 216.6 | 99.9               | 870.4  | 2.1           |
| 46                                                                                                                                          | 3       | 177.0                           | 0.0981                          | 6.834                           | 0.021                    | 5.2   | 98.9               | 936.6  | 43.8          |

Argon data for Wirt member samples.

| ID                                                                                                                                          | Power<br>(watts) | $^{40}\text{Ar}/^{39}\text{Ar}$ | $^{37}\text{Ar}/^{39}\text{Ar}$ | $^{36}\text{Ar}/^{39}\text{Ar}$<br>( $\times 10^{-3}$ ) | $^{39}\text{Ar}_K$<br>( $\times 10^{-15}$ mol) | K/Ca   | $^{40}\text{Ar}^*$<br>(%) | Age<br>(Ma) | $\pm 1\sigma$<br>(Ma) |
|---------------------------------------------------------------------------------------------------------------------------------------------|------------------|---------------------------------|---------------------------------|---------------------------------------------------------|------------------------------------------------|--------|---------------------------|-------------|-----------------------|
| <b>6-2-15-B, Sanidine/Microcline, J=0.0038183<math>\pm</math>0.03%, IC=1.029837<math>\pm</math>0.0011228, NM-277G, Lab#=63813, Argus VI</b> |                  |                                 |                                 |                                                         |                                                |        |                           |             |                       |
| 49                                                                                                                                          | 3                | 182.9                           | -0.0002                         | 0.4396                                                  | 0.819                                          | -      | 99.9                      | 968.8       | 1.5                   |
| 47                                                                                                                                          | 3                | 227.3                           | -0.0424                         | 6.265                                                   | 0.014                                          | -      | 99.2                      | 1136.6      | 92.2                  |
| <b>6-2-15-B, Sanidine/Microcline, J=0.0038176<math>\pm</math>0.03%, IC=1.022159<math>\pm</math>0.003528, NM-277G, Lab#=63814, Argus VI</b>  |                  |                                 |                                 |                                                         |                                                |        |                           |             |                       |
| 18                                                                                                                                          | 4                | 11.02                           | 0.0230                          | 0.5298                                                  | 0.272                                          | 22.2   | 98.6                      | 74.36       | 0.37                  |
| 37                                                                                                                                          | 4                | 11.80                           | -0.0012                         | 0.9548                                                  | 0.453                                          | -      | 97.6                      | 78.73       | 0.22                  |
| 26                                                                                                                                          | 4                | 12.15                           | 0.0145                          | 0.6697                                                  | 0.232                                          | 35.2   | 98.4                      | 81.60       | 0.43                  |
| 36                                                                                                                                          | 4                | 12.25                           | 0.0021                          | 0.4810                                                  | 1.023                                          | 239.3  | 98.8                      | 82.666      | 0.099                 |
| 31                                                                                                                                          | 4                | 13.10                           | 0.0070                          | 0.3854                                                  | 0.323                                          | 72.7   | 99.1                      | 88.52       | 0.31                  |
| 14                                                                                                                                          | 4                | 23.71                           | 0.0134                          | 1.447                                                   | 0.150                                          | 38.0   | 98.2                      | 155.8       | 1.6                   |
| 46                                                                                                                                          | 4                | 25.62                           | 0.0064                          | 0.6810                                                  | 0.411                                          | 79.6   | 99.2                      | 169.51      | 0.72                  |
| 32                                                                                                                                          | 4                | 27.28                           | 0.0009                          | 0.4180                                                  | 0.637                                          | 543.5  | 99.5                      | 180.49      | 0.51                  |
| 45                                                                                                                                          | 4                | 30.63                           | 0.0554                          | 2.739                                                   | 0.079                                          | 9.2    | 97.4                      | 197.3       | 3.5                   |
| 43                                                                                                                                          | 4                | 33.82                           | -0.0102                         | 0.2731                                                  | 0.310                                          | -      | 99.8                      | 221.7       | 1.1                   |
| 35                                                                                                                                          | 4                | 41.50                           | 0.0008                          | 0.5395                                                  | 0.568                                          | 609.6  | 99.6                      | 268.20      | 0.61                  |
| 27                                                                                                                                          | 4                | 44.41                           | -0.0092                         | 1.550                                                   | 0.149                                          | -      | 99.0                      | 283.9       | 3.0                   |
| 09                                                                                                                                          | 4                | 48.44                           | 0.0110                          | 3.108                                                   | 0.262                                          | 46.4   | 98.1                      | 305.1       | 1.8                   |
| 29                                                                                                                                          | 4                | 86.27                           | 0.0008                          | 0.5871                                                  | 0.264                                          | 654.2  | 99.8                      | 520.1       | 3.2                   |
| 28                                                                                                                                          | 4                | 99.44                           | -0.0078                         | 0.4335                                                  | 0.378                                          | -      | 99.9                      | 588.4       | 2.1                   |
| 13                                                                                                                                          | 4                | 118.8                           | -0.0088                         | 0.6907                                                  | 0.253                                          | -      | 99.8                      | 683.6       | 3.6                   |
| 39                                                                                                                                          | 4                | 122.8                           | -0.0074                         | 0.4825                                                  | 0.436                                          | -      | 99.9                      | 703.2       | 2.5                   |
| 16                                                                                                                                          | 4                | 125.5                           | -0.0115                         | 3.287                                                   | 0.157                                          | -      | 99.2                      | 712.0       | 5.0                   |
| 11                                                                                                                                          | 4                | 146.6                           | -0.0024                         | 0.5612                                                  | 0.425                                          | -      | 99.9                      | 812.9       | 1.9                   |
| 44                                                                                                                                          | 4                | 237.2                           | -0.0013                         | 0.1553                                                  | 0.262                                          | -      | 100.0                     | 1179.9      | 4.5                   |
| 24                                                                                                                                          | 4                | 291.6                           | -0.0015                         | 0.2866                                                  | 0.720                                          | -      | 100.0                     | 1369.4      | 2.3                   |
| 21                                                                                                                                          | 4                | 322.2                           | 0.0015                          | 1.733                                                   | 0.190                                          | 332.4  | 99.8                      | 1466.4      | 6.8                   |
| <b>6-2-15-B, Sanidine/Microcline, J=0.0039347<math>\pm</math>0.01%, IC=1.004012<math>\pm</math>0.0013619, NM-284C, Lab#=65072, Argus VI</b> |                  |                                 |                                 |                                                         |                                                |        |                           |             |                       |
| 02                                                                                                                                          | 4                | 10.73                           | 0.0031                          | 0.0229                                                  | 0.631                                          | 163.5  | 99.9                      | 75.59       | 0.12                  |
| 03                                                                                                                                          | 4                | 11.59                           | 0.0046                          | 0.1639                                                  | 0.368                                          | 110.8  | 99.6                      | 81.26       | 0.12                  |
| 09                                                                                                                                          | 4                | 12.14                           | 0.0013                          | 0.1966                                                  | 0.936                                          | 396.2  | 99.5                      | 84.995      | 0.056                 |
| 07                                                                                                                                          | 4                | 12.21                           | 0.0122                          | 0.1512                                                  | 0.108                                          | 41.7   | 99.6                      | 85.56       | 0.40                  |
| 06                                                                                                                                          | 4                | 12.62                           | 0.0038                          | 1.264                                                   | 0.155                                          | 132.9  | 97.0                      | 86.09       | 0.29                  |
| 04                                                                                                                                          | 4                | 25.05                           | 0.0048                          | 0.0749                                                  | 1.263                                          | 105.3  | 99.9                      | 171.87      | 0.45                  |
| 05                                                                                                                                          | 4                | 35.39                           | 0.0010                          | 1.125                                                   | 0.666                                          | 533.1  | 99.1                      | 236.5       | 1.1                   |
| 01                                                                                                                                          | 4                | 64.07                           | 0.0060                          | 0.1262                                                  | 0.799                                          | 84.4   | 99.9                      | 411.3       | 1.3                   |
| 08                                                                                                                                          | 4                | 252.2                           | 0.0028                          | 0.6366                                                  | 0.913                                          | 180.1  | 99.9                      | 1260.9      | 2.8                   |
| <b>6-2-15-C, Sanidine/Microcline, J=0.0038166<math>\pm</math>0.02%, IC=1.029837<math>\pm</math>0.0011228, NM-277G, Lab#=63815, Argus VI</b> |                  |                                 |                                 |                                                         |                                                |        |                           |             |                       |
| 19                                                                                                                                          | 3                | 9.589                           | 0.0021                          | 0.2074                                                  | 0.513                                          | 242.6  | 99.4                      | 65.33       | 0.12                  |
| 22                                                                                                                                          | 3                | 9.993                           | 0.0083                          | 0.1000                                                  | 0.598                                          | 61.4   | 99.7                      | 68.268      | 0.090                 |
| 27                                                                                                                                          | 3                | 10.80                           | 0.0048                          | 0.0584                                                  | 0.496                                          | 107.0  | 99.8                      | 73.78       | 0.11                  |
| 32                                                                                                                                          | 3                | 10.94                           | -0.0006                         | 0.1246                                                  | 0.399                                          | -      | 99.7                      | 74.57       | 0.13                  |
| 08                                                                                                                                          | 3                | 11.35                           | 0.0119                          | 0.8805                                                  | 0.144                                          | 42.8   | 97.7                      | 75.83       | 0.36                  |
| 11                                                                                                                                          | 3                | 11.94                           | 0.0002                          | 0.8923                                                  | 0.398                                          | 2436.5 | 97.8                      | 79.78       | 0.14                  |
| 04                                                                                                                                          | 3                | 12.05                           | 0.0021                          | 0.7150                                                  | 0.403                                          | 247.9  | 98.2                      | 80.87       | 0.14                  |
| 46                                                                                                                                          | 3                | 12.02                           | 0.0063                          | 0.1547                                                  | 0.460                                          | 81.1   | 99.6                      | 81.73       | 0.12                  |
| 26                                                                                                                                          | 3                | 13.13                           | 0.0054                          | 0.4228                                                  | 0.491                                          | 94.6   | 99.1                      | 88.59       | 0.11                  |
| 16                                                                                                                                          | 3                | 13.61                           | 0.0064                          | 0.3979                                                  | 0.190                                          | 80.2   | 99.1                      | 91.86       | 0.29                  |
| 61                                                                                                                                          | 3                | 14.88                           | -0.0032                         | 0.4293                                                  | 0.093                                          | -      | 99.1                      | 100.24      | 0.86                  |
| 37                                                                                                                                          | 3                | 16.27                           | 0.0005                          | 2.701                                                   | 0.414                                          | 1017.6 | 95.1                      | 104.98      | 0.27                  |
| 35                                                                                                                                          | 3                | 16.00                           | 0.0113                          | 0.3424                                                  | 0.241                                          | 45.0   | 99.4                      | 107.82      | 0.37                  |
| 44                                                                                                                                          | 3                | 16.31                           | 0.0154                          | 0.2656                                                  | 0.529                                          | 33.1   | 99.5                      | 109.99      | 0.18                  |

Argon data for Wirt member samples.

| ID                                                                                                                                          | Power   | $^{40}\text{Ar}/^{39}\text{Ar}$ | $^{37}\text{Ar}/^{39}\text{Ar}$ | $^{36}\text{Ar}/^{39}\text{Ar}$ | $^{39}\text{Ar}_K$       | K/Ca   | $^{40}\text{Ar}^*$ | Age     | $\pm 1\sigma$ |
|---------------------------------------------------------------------------------------------------------------------------------------------|---------|---------------------------------|---------------------------------|---------------------------------|--------------------------|--------|--------------------|---------|---------------|
|                                                                                                                                             | (watts) |                                 |                                 | ( $\times 10^{-3}$ )            | ( $\times 10^{-15}$ mol) |        | (%)                | (Ma)    | (Ma)          |
| <b>6-2-15-C, Sanidine/Microcline, J=0.0038166<math>\pm</math>0.02%, IC=1.029837<math>\pm</math>0.0011228, NM-277G, Lab#=63815, Argus VI</b> |         |                                 |                                 |                                 |                          |        |                    |         |               |
| 66                                                                                                                                          | 3       | 16.58                           | -0.0002                         | 0.6267                          | 0.875                    | -      | 98.9               | 111.02  | 0.12          |
| 06                                                                                                                                          | 3       | 16.70                           | 0.0103                          | 0.1719                          | 0.194                    | 49.8   | 99.7               | 112.76  | 0.48          |
| 58                                                                                                                                          | 3       | 18.84                           | -0.0112                         | 0.1441                          | 0.084                    | -      | 99.8               | 126.7   | 1.1           |
| 23                                                                                                                                          | 3       | 19.91                           | -0.0007                         | 0.7580                          | 0.170                    | -      | 98.9               | 132.57  | 0.62          |
| 63                                                                                                                                          | 3       | 19.88                           | 0.0045                          | 0.1305                          | 0.148                    | 113.7  | 99.8               | 133.54  | 0.68          |
| 14                                                                                                                                          | 3       | 20.91                           | 0.0024                          | 0.7752                          | 0.572                    | 213.7  | 98.9               | 139.01  | 0.21          |
| 28                                                                                                                                          | 3       | 25.63                           | -0.0014                         | 0.2854                          | 0.485                    | -      | 99.7               | 170.27  | 0.35          |
| 49                                                                                                                                          | 3       | 27.42                           | 0.0142                          | 1.495                           | 0.036                    | 36.0   | 98.4               | 179.4   | 3.5           |
| 25                                                                                                                                          | 3       | 27.13                           | -0.0023                         | 0.2986                          | 0.603                    | -      | 99.7               | 179.75  | 0.22          |
| 20                                                                                                                                          | 3       | 29.72                           | -0.0079                         | 1.156                           | 0.071                    | -      | 98.8               | 194.5   | 2.4           |
| 07                                                                                                                                          | 3       | 34.01                           | 0.0074                          | 0.1837                          | 0.441                    | 69.3   | 99.8               | 223.04  | 0.34          |
| 65                                                                                                                                          | 3       | 37.91                           | 0.0027                          | 0.1737                          | 0.777                    | 187.8  | 99.9               | 247.00  | 0.22          |
| 52                                                                                                                                          | 3       | 43.67                           | 0.0093                          | 0.3793                          | 0.109                    | 55.1   | 99.7               | 281.5   | 1.9           |
| 15                                                                                                                                          | 3       | 45.13                           | 0.0058                          | 0.8626                          | 0.481                    | 88.4   | 99.4               | 289.33  | 0.42          |
| 47                                                                                                                                          | 3       | 45.86                           | 0.0051                          | 0.9044                          | 0.361                    | 99.9   | 99.4               | 293.61  | 0.60          |
| 29                                                                                                                                          | 3       | 46.48                           | -0.0141                         | 2.083                           | 0.048                    | -      | 98.7               | 295.2   | 4.6           |
| 55                                                                                                                                          | 3       | 53.44                           | 0.0032                          | 0.5430                          | 0.478                    | 159.4  | 99.7               | 338.80  | 0.52          |
| 40                                                                                                                                          | 3       | 54.35                           | 0.0057                          | 1.378                           | 0.687                    | 89.7   | 99.3               | 342.66  | 0.40          |
| 10                                                                                                                                          | 3       | 61.48                           | 0.0064                          | 0.2856                          | 0.290                    | 80.3   | 99.9               | 385.33  | 0.99          |
| 59                                                                                                                                          | 3       | 62.72                           | 0.0053                          | 0.3678                          | 0.531                    | 96.2   | 99.8               | 392.16  | 0.50          |
| 50                                                                                                                                          | 3       | 66.00                           | 0.0088                          | 0.2504                          | 0.281                    | 58.2   | 99.9               | 410.81  | 0.94          |
| 12                                                                                                                                          | 3       | 68.38                           | -0.0049                         | 0.2549                          | 0.266                    | -      | 99.9               | 424.0   | 1.0           |
| 48                                                                                                                                          | 3       | 69.81                           | 0.0012                          | 0.2696                          | 0.406                    | 438.2  | 99.9               | 431.90  | 0.71          |
| 54                                                                                                                                          | 3       | 76.41                           | 0.0067                          | 0.1248                          | 0.432                    | 76.4   | 100.0              | 468.17  | 0.67          |
| 45                                                                                                                                          | 3       | 92.22                           | 0.0011                          | 0.7045                          | 0.628                    | 462.6  | 99.8               | 550.88  | 0.62          |
| 33                                                                                                                                          | 3       | 92.37                           | 0.0040                          | 0.5714                          | 0.436                    | 128.6  | 99.8               | 551.89  | 0.84          |
| 09                                                                                                                                          | 3       | 96.72                           | 0.0013                          | 0.8169                          | 0.389                    | 396.6  | 99.8               | 573.82  | 0.98          |
| 64                                                                                                                                          | 3       | 103.6                           | 0.0024                          | 1.127                           | 0.343                    | 215.5  | 99.7               | 608.1   | 1.2           |
| 60                                                                                                                                          | 3       | 105.1                           | 0.0086                          | 0.3869                          | 0.466                    | 59.4   | 99.9               | 616.71  | 0.83          |
| 21                                                                                                                                          | 3       | 116.2                           | 0.0042                          | 0.4283                          | 0.580                    | 121.4  | 99.9               | 671.11  | 0.74          |
| 42                                                                                                                                          | 3       | 119.1                           | 0.0032                          | 0.2288                          | 0.592                    | 161.7  | 99.9               | 685.72  | 0.67          |
| 43                                                                                                                                          | 3       | 119.3                           | 0.0032                          | 0.2220                          | 0.624                    | 161.0  | 99.9               | 686.42  | 0.76          |
| 70                                                                                                                                          | 3       | 120.5                           | 0.0048                          | 0.1726                          | 0.716                    | 106.7  | 100.0              | 692.13  | 0.67          |
| 68                                                                                                                                          | 3       | 121.2                           | 0.0003                          | 0.3930                          | 0.185                    | 2028.6 | 99.9               | 695.5   | 2.4           |
| 71                                                                                                                                          | 3       | 127.9                           | -0.0013                         | 1.475                           | 0.428                    | -      | 99.7               | 725.8   | 1.3           |
| 17                                                                                                                                          | 3       | 128.6                           | -0.0001                         | 0.2312                          | 0.736                    | -      | 99.9               | 730.39  | 0.65          |
| 69                                                                                                                                          | 3       | 155.4                           | 0.0117                          | 1.838                           | 0.220                    | 43.5   | 99.7               | 850.2   | 2.1           |
| 62                                                                                                                                          | 3       | 156.8                           | 0.0020                          | 0.3884                          | 0.366                    | 253.1  | 99.9               | 858.2   | 1.3           |
| 57                                                                                                                                          | 3       | 160.4                           | 0.0068                          | 0.8672                          | 0.322                    | 75.6   | 99.8               | 873.1   | 1.9           |
| 34                                                                                                                                          | 3       | 160.7                           | 0.0032                          | 0.9023                          | 0.600                    | 161.1  | 99.8               | 874.4   | 1.0           |
| 30                                                                                                                                          | 3       | 176.0                           | 0.0035                          | 0.2258                          | 0.451                    | 146.0  | 100.0              | 940.4   | 1.4           |
| 05                                                                                                                                          | 3       | 180.5                           | 0.0045                          | 0.2308                          | 0.354                    | 113.5  | 100.0              | 959.1   | 1.5           |
| 36                                                                                                                                          | 3       | 185.9                           | 0.0061                          | 0.9264                          | 0.459                    | 84.1   | 99.9               | 980.3   | 1.3           |
| 51                                                                                                                                          | 3       | 186.3                           | 0.0045                          | 0.0996                          | 1.237                    | 114.1  | 100.0              | 983.11  | 0.63          |
| 56                                                                                                                                          | 3       | 187.7                           | 0.0011                          | 0.3463                          | 0.364                    | 461.6  | 99.9               | 988.4   | 1.6           |
| 39                                                                                                                                          | 3       | 188.6                           | 0.0002                          | 0.7981                          | 0.728                    | 2650.4 | 99.9               | 991.61  | 0.91          |
| 24                                                                                                                                          | 3       | 196.1                           | 0.0009                          | 0.3101                          | 0.580                    | 570.4  | 100.0              | 1022.2  | 1.1           |
| 38                                                                                                                                          | 3       | 197.1                           | 0.0095                          | 0.2620                          | 0.182                    | 53.6   | 100.0              | 1026.2  | 3.4           |
| 02                                                                                                                                          | 3       | 207.9                           | 0.0005                          | 0.3804                          | 1.003                    | 949.7  | 99.9               | 1068.66 | 0.79          |
| 31                                                                                                                                          | 3       | 209.8                           | 0.0049                          | 0.1856                          | 0.661                    | 105.1  | 100.0              | 1076.52 | 0.90          |
| 18                                                                                                                                          | 3       | 242.5                           | 0.0081                          | 0.4561                          | 0.181                    | 63.1   | 99.9               | 1198.8  | 3.3           |
| 13                                                                                                                                          | 3       | 247.4                           | 0.0017                          | 0.3679                          | 0.301                    | 303.0  | 100.0              | 1216.6  | 2.4           |
| 67                                                                                                                                          | 3       | 261.4                           | 0.0027                          | 0.1269                          | 0.175                    | 189.8  | 100.0              | 1266.4  | 3.8           |

Argon data for Wirt member samples.

| ID                                                                                                                                         | Power   | $^{40}\text{Ar}/^{39}\text{Ar}$ | $^{37}\text{Ar}/^{39}\text{Ar}$ | $^{36}\text{Ar}/^{39}\text{Ar}$ | $^{39}\text{Ar}_K$       | K/Ca   | $^{40}\text{Ar}^*$ | Age    | $\pm 1\sigma$ |
|--------------------------------------------------------------------------------------------------------------------------------------------|---------|---------------------------------|---------------------------------|---------------------------------|--------------------------|--------|--------------------|--------|---------------|
|                                                                                                                                            | (watts) |                                 |                                 | ( $\times 10^{-3}$ )            | ( $\times 10^{-15}$ mol) |        | (%)                | (Ma)   | (Ma)          |
| <b>6-2-15-C, Sanidine/Microcline, J=0.0038164<math>\pm</math>0.02%, IC=1.022159<math>\pm</math>0.003528, NM-277G, Lab#=63816, Argus VI</b> |         |                                 |                                 |                                 |                          |        |                    |        |               |
| 24                                                                                                                                         | 4       | 11.95                           | 0.0028                          | 0.4504                          | 0.222                    | 180.2  | 98.9               | 80.72  | 0.45          |
| 07                                                                                                                                         | 4       | 14.28                           | -0.0011                         | 0.4797                          | 0.517                    | -      | 99.0               | 96.11  | 0.45          |
| 14                                                                                                                                         | 4       | 15.77                           | -0.0015                         | 0.7980                          | 0.706                    | -      | 98.5               | 105.37 | 0.44          |
| 16                                                                                                                                         | 4       | 16.28                           | 0.0022                          | 1.822                           | 0.670                    | 233.8  | 96.7               | 106.72 | 0.47          |
| 06                                                                                                                                         | 4       | 18.90                           | 0.0072                          | 1.172                           | 1.054                    | 70.4   | 98.2               | 125.19 | 0.30          |
| 31                                                                                                                                         | 4       | 21.41                           | 0.0007                          | 0.5282                          | 0.831                    | 729.9  | 99.3               | 142.69 | 0.46          |
| 11                                                                                                                                         | 4       | 23.48                           | 0.0002                          | 1.499                           | 0.438                    | 3010.1 | 98.1               | 154.20 | 0.80          |
| 36                                                                                                                                         | 4       | 24.04                           | 0.0112                          | 0.6938                          | 0.204                    | 45.5   | 99.2               | 159.3  | 1.6           |
| 27                                                                                                                                         | 4       | 26.15                           | 0.0125                          | 2.671                           | 0.197                    | 40.7   | 97.0               | 169.1  | 1.9           |
| 25                                                                                                                                         | 4       | 32.43                           | 0.1068                          | 12.49                           | 0.069                    | 4.8    | 88.6               | 190.5  | 5.4           |
| 13                                                                                                                                         | 4       | 29.96                           | 0.0063                          | 0.2542                          | 0.605                    | 80.5   | 99.8               | 197.62 | 0.75          |
| 29                                                                                                                                         | 4       | 35.16                           | 0.0055                          | 2.014                           | 0.844                    | 93.3   | 98.3               | 226.79 | 0.72          |
| 19                                                                                                                                         | 4       | 35.12                           | -0.0025                         | 1.374                           | 0.409                    | -      | 98.8               | 227.7  | 1.2           |
| 15                                                                                                                                         | 4       | 36.65                           | 0.0088                          | 0.7023                          | 0.994                    | 58.3   | 99.4               | 238.30 | 0.51          |
| 30                                                                                                                                         | 4       | 37.18                           | 0.0092                          | 1.057                           | 0.585                    | 55.2   | 99.2               | 240.94 | 0.76          |
| 10                                                                                                                                         | 4       | 38.36                           | 0.0137                          | 1.820                           | 0.320                    | 37.1   | 98.6               | 246.8  | 1.6           |
| 35                                                                                                                                         | 4       | 44.53                           | 0.0310                          | 3.697                           | 0.130                    | 16.4   | 97.6               | 280.8  | 4.4           |
| 04                                                                                                                                         | 4       | 51.71                           | 0.0029                          | 0.7634                          | 0.433                    | 173.2  | 99.6               | 328.3  | 2.0           |
| 21                                                                                                                                         | 4       | 71.96                           | -0.0020                         | 1.204                           | 0.282                    | -      | 99.5               | 442.2  | 3.0           |
| 39                                                                                                                                         | 4       | 72.35                           | 0.0048                          | 1.622                           | 0.190                    | 106.7  | 99.3               | 443.7  | 4.9           |
| 02                                                                                                                                         | 4       | 76.57                           | -0.0032                         | 0.3644                          | 0.678                    | -      | 99.9               | 468.7  | 1.5           |
| 18                                                                                                                                         | 4       | 84.58                           | 0.0020                          | 0.5577                          | 0.865                    | 253.8  | 99.8               | 511.2  | 1.0           |
| 38                                                                                                                                         | 4       | 85.17                           | 0.0149                          | 1.280                           | 0.566                    | 34.3   | 99.6               | 513.1  | 2.1           |
| 05                                                                                                                                         | 4       | 97.09                           | 0.0091                          | 0.4203                          | 0.759                    | 56.3   | 99.9               | 576.3  | 1.3           |
| 20                                                                                                                                         | 4       | 98.40                           | -0.0019                         | 1.205                           | 0.280                    | -      | 99.6               | 581.8  | 4.6           |
| 23                                                                                                                                         | 4       | 105.2                           | 0.0126                          | 1.759                           | 0.264                    | 40.6   | 99.5               | 615.3  | 4.2           |
| 28                                                                                                                                         | 4       | 114.6                           | 0.0087                          | 1.957                           | 0.199                    | 58.9   | 99.5               | 661.5  | 6.6           |
| 17                                                                                                                                         | 4       | 119.0                           | 0.0010                          | 0.7931                          | 0.719                    | 486.5  | 99.8               | 684.1  | 2.2           |
| 37                                                                                                                                         | 4       | 163.6                           | 0.0039                          | 0.6275                          | 0.337                    | 131.5  | 99.9               | 887.2  | 4.8           |
| 34                                                                                                                                         | 4       | 168.2                           | -0.0038                         | 0.4058                          | 0.894                    | -      | 99.9               | 907.2  | 1.8           |
| 12                                                                                                                                         | 4       | 172.9                           | -0.0205                         | 2.421                           | 0.171                    | -      | 99.6               | 924.6  | 8.3           |
| 22                                                                                                                                         | 4       | 174.1                           | 0.0041                          | 1.029                           | 0.717                    | 124.1  | 99.8               | 931.1  | 2.1           |
| 26                                                                                                                                         | 4       | 229.7                           | 0.0035                          | 3.277                           | 0.465                    | 145.2  | 99.6               | 1148.7 | 3.9           |
| 08                                                                                                                                         | 4       | 273.9                           | 0.0035                          | 0.2707                          | 0.646                    | 146.7  | 100.0              | 1309.6 | 3.2           |
| <b>6-2-15-C, Sanidine/Microcline, J=0.0039346<math>\pm</math>0.01%, IC=1.00454<math>\pm</math>0.002106, NM-284C, Lab#=65071, Argus VI</b>  |         |                                 |                                 |                                 |                          |        |                    |        |               |
| 244                                                                                                                                        | 4       | 9.320                           | 0.0086                          | 0.1441                          | 0.469                    | 59.5   | 99.5               | 65.583 | 0.089         |
| 171                                                                                                                                        | 4       | 9.341                           | 0.0083                          | 0.0957                          | 0.424                    | 61.6   | 99.7               | 65.823 | 0.096         |
| 80                                                                                                                                         | 4       | 10.23                           | 0.0027                          | 0.0748                          | 0.259                    | 188.2  | 99.8               | 72.06  | 0.11          |
| 265                                                                                                                                        | 4       | 10.58                           | 0.0039                          | 0.7192                          | 0.669                    | 130.7  | 98.0               | 73.140 | 0.048         |
| 82                                                                                                                                         | 4       | 10.39                           | 0.0032                          | 0.0730                          | 0.984                    | 160.4  | 99.8               | 73.166 | 0.033         |
| 107                                                                                                                                        | 4       | 10.65                           | 0.0110                          | 0.0604                          | 0.321                    | 46.5   | 99.8               | 74.940 | 0.089         |
| 05                                                                                                                                         | 3.5     | 10.82                           | 0.0078                          | 0.3341                          | 0.164                    | 65.6   | 99.1               | 75.61  | 0.37          |
| 236                                                                                                                                        | 4       | 10.79                           | 0.0100                          | 0.1866                          | 0.307                    | 51.2   | 99.5               | 75.654 | 0.097         |
| 15                                                                                                                                         | 3.5     | 10.83                           | 0.0053                          | 0.0815                          | 0.514                    | 95.8   | 99.8               | 76.17  | 0.12          |
| 79                                                                                                                                         | 4       | 10.83                           | 0.0066                          | 0.0376                          | 0.459                    | 77.1   | 99.9               | 76.252 | 0.066         |
| 215                                                                                                                                        | 4       | 10.92                           | 0.0117                          | 0.1997                          | 0.189                    | 43.5   | 99.5               | 76.58  | 0.15          |
| 105                                                                                                                                        | 4       | 11.36                           | 0.0026                          | 1.644                           | 0.651                    | 196.2  | 95.7               | 76.644 | 0.053         |
| 264                                                                                                                                        | 4       | 11.12                           | 0.0040                          | 0.6991                          | 0.193                    | 128.1  | 98.1               | 76.94  | 0.15          |
| 137                                                                                                                                        | 4       | 11.28                           | 0.0039                          | 1.095                           | 0.822                    | 129.8  | 97.1               | 77.218 | 0.044         |
| 172                                                                                                                                        | 4       | 11.13                           | 0.0057                          | 0.0963                          | 0.406                    | 89.8   | 99.7               | 78.238 | 0.079         |
| 230                                                                                                                                        | 4       | 11.22                           | 0.0061                          | 0.0663                          | 0.394                    | 83.7   | 99.8               | 78.873 | 0.078         |
| 96                                                                                                                                         | 4       | 15.18                           | -0.0617                         | 13.40                           | 0.029                    | -      | 73.9               | 79.0   | 4.1           |
| 126                                                                                                                                        | 4       | 11.76                           | 0.0022                          | 0.9739                          | 0.868                    | 228.1  | 97.6               | 80.772 | 0.043         |

Argon data for Wirt member samples.

| ID                                                                                                                                        | Power   | $^{40}\text{Ar}/^{39}\text{Ar}$ | $^{37}\text{Ar}/^{39}\text{Ar}$ | $^{36}\text{Ar}/^{39}\text{Ar}$ | $^{39}\text{Ar}_K$       | K/Ca   | $^{40}\text{Ar}^*$ | Age    | $\pm 1\sigma$ |
|-------------------------------------------------------------------------------------------------------------------------------------------|---------|---------------------------------|---------------------------------|---------------------------------|--------------------------|--------|--------------------|--------|---------------|
|                                                                                                                                           | (watts) |                                 |                                 | ( $\times 10^{-3}$ )            | ( $\times 10^{-15}$ mol) |        | (%)                | (Ma)   | (Ma)          |
| <b>6-2-15-C, Sanidine/Microcline, J=0.0039346<math>\pm</math>0.01%, IC=1.00454<math>\pm</math>0.002106, NM-284C, Lab#=65071, Argus VI</b> |         |                                 |                                 |                                 |                          |        |                    |        |               |
| 23                                                                                                                                        | 3.5     | 11.69                           | 0.0099                          | 0.5575                          | 0.583                    | 51.4   | 98.6               | 81.14  | 0.11          |
| 219                                                                                                                                       | 4       | 11.59                           | 0.0071                          | 0.0884                          | 0.456                    | 71.9   | 99.8               | 81.399 | 0.070         |
| 252                                                                                                                                       | 4       | 11.71                           | 0.0033                          | 0.4269                          | 0.715                    | 155.9  | 98.9               | 81.549 | 0.049         |
| 52                                                                                                                                        | 3.5     | 11.98                           | 0.0021                          | 1.160                           | 0.789                    | 247.4  | 97.1               | 81.913 | 0.091         |
| 59                                                                                                                                        | 4       | 11.72                           | 0.0026                          | 0.2163                          | 0.691                    | 198.1  | 99.5               | 82.014 | 0.048         |
| 78                                                                                                                                        | 4       | 11.83                           | 0.0027                          | 0.3919                          | 0.595                    | 186.6  | 99.0               | 82.456 | 0.055         |
| 261                                                                                                                                       | 4       | 11.93                           | 0.0027                          | 0.5681                          | 0.735                    | 191.3  | 98.6               | 82.761 | 0.048         |
| 83                                                                                                                                        | 4       | 12.06                           | 0.0065                          | 0.7883                          | 0.421                    | 78.4   | 98.1               | 83.180 | 0.080         |
| 85                                                                                                                                        | 4       | 12.04                           | 0.0019                          | 0.4356                          | 0.489                    | 262.2  | 98.9               | 83.807 | 0.063         |
| 72                                                                                                                                        | 4       | 12.19                           | -0.0012                         | 0.3016                          | 0.457                    | -      | 99.3               | 85.063 | 0.070         |
| 142                                                                                                                                       | 4       | 12.13                           | 0.0028                          | 0.0755                          | 0.642                    | 179.8  | 99.8               | 85.163 | 0.052         |
| 108                                                                                                                                       | 4       | 12.52                           | 0.0080                          | 0.7442                          | 0.479                    | 63.7   | 98.2               | 86.487 | 0.069         |
| 117                                                                                                                                       | 4       | 13.15                           | 0.0029                          | 0.7351                          | 0.748                    | 178.9  | 98.3               | 90.786 | 0.049         |
| 198                                                                                                                                       | 4       | 13.21                           | 0.0078                          | 0.1592                          | 0.238                    | 65.6   | 99.6               | 92.38  | 0.14          |
| 08                                                                                                                                        | 3.5     | 13.40                           | -0.0015                         | 0.7376                          | 0.723                    | -      | 98.4               | 92.533 | 0.097         |
| 128                                                                                                                                       | 4       | 14.09                           | 0.0065                          | 0.7997                          | 0.527                    | 79.0   | 98.3               | 97.078 | 0.071         |
| 60                                                                                                                                        | 4       | 16.20                           | 0.0540                          | 5.854                           | 0.066                    | 9.4    | 89.3               | 101.3  | 2.0           |
| 58                                                                                                                                        | 3.5     | 14.76                           | 0.0003                          | 0.7650                          | 0.541                    | 1779.0 | 98.5               | 101.77 | 0.48          |
| 69                                                                                                                                        | 4       | 15.80                           | 0.0194                          | 0.1578                          | 0.411                    | 26.3   | 99.7               | 110.05 | 0.36          |
| 113                                                                                                                                       | 4       | 17.56                           | 0.0126                          | 1.505                           | 0.611                    | 40.4   | 97.5               | 119.22 | 0.31          |
| 118                                                                                                                                       | 4       | 17.55                           | -0.0002                         | 0.7670                          | 0.820                    | -      | 98.7               | 120.65 | 0.24          |
| 205                                                                                                                                       | 4       | 18.27                           | 0.0087                          | 0.5928                          | 0.585                    | 58.9   | 99.0               | 125.86 | 0.34          |
| 164                                                                                                                                       | 4       | 18.63                           | 0.0308                          | 1.414                           | 0.268                    | 16.6   | 97.8               | 126.63 | 0.71          |
| 17                                                                                                                                        | 3.5     | 19.35                           | 0.0034                          | 1.378                           | 0.636                    | 150.5  | 97.9               | 131.57 | 0.52          |
| 135                                                                                                                                       | 4       | 19.87                           | -0.0078                         | 1.003                           | 0.578                    | -      | 98.5               | 135.73 | 0.29          |
| 124                                                                                                                                       | 4       | 21.06                           | -0.0035                         | 1.172                           | 0.722                    | -      | 98.4               | 143.36 | 0.24          |
| 225                                                                                                                                       | 4       | 21.70                           | -0.0011                         | 0.5182                          | 0.590                    | -      | 99.3               | 148.90 | 0.42          |
| 222                                                                                                                                       | 4       | 22.30                           | 0.0070                          | 0.5849                          | 0.799                    | 72.5   | 99.2               | 152.73 | 0.30          |
| 129                                                                                                                                       | 4       | 23.21                           | 0.0065                          | 1.255                           | 0.184                    | 78.3   | 98.4               | 157.44 | 0.96          |
| 237                                                                                                                                       | 4       | 23.72                           | 0.0008                          | 0.1900                          | 0.348                    | 645.6  | 99.8               | 162.91 | 0.53          |
| 19                                                                                                                                        | 3.5     | 23.98                           | 0.0040                          | 0.2622                          | 0.734                    | 128.8  | 99.7               | 164.47 | 0.46          |
| 161                                                                                                                                       | 4       | 25.56                           | 0.0050                          | 0.5390                          | 0.521                    | 101.9  | 99.4               | 174.33 | 0.50          |
| 253                                                                                                                                       | 4       | 26.59                           | 0.0057                          | 0.9957                          | 0.471                    | 89.4   | 98.9               | 180.20 | 0.68          |
| 160                                                                                                                                       | 4       | 27.42                           | -0.0074                         | 0.8006                          | 0.150                    | -      | 99.1               | 185.9  | 1.8           |
| 165                                                                                                                                       | 4       | 28.65                           | 0.0126                          | 0.4769                          | 0.689                    | 40.6   | 99.5               | 194.58 | 0.42          |
| 24                                                                                                                                        | 3.5     | 29.03                           | -0.0013                         | 0.2451                          | 0.633                    | -      | 99.8               | 197.47 | 0.83          |
| 35                                                                                                                                        | 3.5     | 29.51                           | -0.0041                         | 0.9738                          | 0.313                    | -      | 99.0               | 199.2  | 1.9           |
| 246                                                                                                                                       | 4       | 30.51                           | 0.0123                          | 1.243                           | 0.409                    | 41.6   | 98.8               | 205.09 | 0.61          |
| 28                                                                                                                                        | 3.5     | 30.52                           | -0.0003                         | 0.6873                          | 0.431                    | -      | 99.3               | 206.2  | 1.3           |
| 259                                                                                                                                       | 4       | 30.43                           | 0.0057                          | 0.1890                          | 0.616                    | 89.1   | 99.8               | 206.59 | 0.52          |
| 213                                                                                                                                       | 4       | 30.91                           | -0.0026                         | 0.2125                          | 1.062                    | -      | 99.8               | 209.66 | 0.35          |
| 64                                                                                                                                        | 4       | 32.48                           | 0.0092                          | 0.0784                          | 0.455                    | 55.2   | 99.9               | 219.96 | 0.62          |
| 111                                                                                                                                       | 4       | 33.37                           | 0.0107                          | 0.5146                          | 0.697                    | 47.5   | 99.5               | 224.83 | 0.49          |
| 71                                                                                                                                        | 4       | 33.62                           | -0.0042                         | 0.2056                          | 0.747                    | -      | 99.8               | 226.95 | 0.42          |
| 251                                                                                                                                       | 4       | 34.03                           | 0.0280                          | 0.2267                          | 0.400                    | 18.2   | 99.8               | 229.54 | 0.81          |
| 84                                                                                                                                        | 4       | 34.47                           | 0.0071                          | 0.6439                          | 0.383                    | 71.4   | 99.4               | 231.56 | 0.67          |
| 193                                                                                                                                       | 4       | 34.99                           | 0.0059                          | 0.4556                          | 0.667                    | 85.8   | 99.6               | 235.22 | 0.43          |
| 133                                                                                                                                       | 4       | 35.33                           | 0.0188                          | 0.7857                          | 0.346                    | 27.1   | 99.3               | 236.72 | 0.81          |
| 94                                                                                                                                        | 4       | 35.53                           | 0.0007                          | 0.1654                          | 0.535                    | 751.0  | 99.9               | 239.19 | 0.56          |
| 26                                                                                                                                        | 3.5     | 35.76                           | 0.0042                          | 0.4141                          | 0.190                    | 120.1  | 99.7               | 240.1  | 3.2           |
| 03                                                                                                                                        | 3.5     | 35.90                           | 0.0052                          | 0.6995                          | 0.713                    | 97.9   | 99.4               | 240.5  | 1.0           |
| 169                                                                                                                                       | 4       | 36.80                           | 0.0035                          | 0.2175                          | 0.815                    | 146.8  | 99.8               | 247.08 | 0.48          |
| 100                                                                                                                                       | 4       | 37.04                           | 0.0254                          | 0.7273                          | 0.472                    | 20.1   | 99.4               | 247.67 | 0.79          |
| 183                                                                                                                                       | 4       | 37.24                           | 0.0572                          | 1.215                           | 0.070                    | 8.9    | 99.0               | 248.0  | 3.5           |

Argon data for Wirt member samples.

| ID                                                                                                                                        | Power   | $^{40}\text{Ar}/^{39}\text{Ar}$ | $^{37}\text{Ar}/^{39}\text{Ar}$ | $^{36}\text{Ar}/^{39}\text{Ar}$ | $^{39}\text{Ar}_K$       | K/Ca   | $^{40}\text{Ar}^*$ | Age    | $\pm 1\sigma$ |
|-------------------------------------------------------------------------------------------------------------------------------------------|---------|---------------------------------|---------------------------------|---------------------------------|--------------------------|--------|--------------------|--------|---------------|
|                                                                                                                                           | (watts) |                                 |                                 | ( $\times 10^{-3}$ )            | ( $\times 10^{-15}$ mol) |        | (%)                | (Ma)   | (Ma)          |
| <b>6-2-15-C, Sanidine/Microcline, J=0.0039346<math>\pm</math>0.01%, IC=1.00454<math>\pm</math>0.002106, NM-284C, Lab#=65071, Argus VI</b> |         |                                 |                                 |                                 |                          |        |                    |        |               |
| 204                                                                                                                                       | 4       | 37.52                           | 0.0127                          | 0.7695                          | 0.312                    | 40.0   | 99.4               | 250.6  | 1.0           |
| 150                                                                                                                                       | 4       | 38.87                           | -0.0008                         | 0.2902                          | 0.867                    | -      | 99.8               | 259.92 | 0.37          |
| 87                                                                                                                                        | 4       | 40.10                           | 0.0116                          | 0.4019                          | 0.613                    | 44.1   | 99.7               | 267.38 | 0.40          |
| 115                                                                                                                                       | 4       | 40.35                           | 0.0083                          | 1.161                           | 0.566                    | 61.6   | 99.2               | 267.57 | 0.59          |
| 40                                                                                                                                        | 3.5     | 41.89                           | -0.0024                         | 1.528                           | 0.619                    | -      | 98.9               | 276.4  | 1.3           |
| 09                                                                                                                                        | 3.5     | 42.47                           | -0.0007                         | 0.0067                          | 0.328                    | -      | 100.0              | 282.8  | 2.1           |
| 159                                                                                                                                       | 4       | 43.26                           | -0.0095                         | 0.7664                          | 0.558                    | -      | 99.5               | 286.25 | 0.76          |
| 101                                                                                                                                       | 4       | 43.26                           | 0.0047                          | 0.4969                          | 0.812                    | 108.2  | 99.7               | 286.79 | 0.43          |
| 110                                                                                                                                       | 4       | 43.80                           | -0.0008                         | 0.7849                          | 0.553                    | -      | 99.5               | 289.57 | 0.59          |
| 166                                                                                                                                       | 4       | 44.16                           | -0.0059                         | 0.5114                          | 0.390                    | -      | 99.7               | 292.31 | 0.94          |
| 104                                                                                                                                       | 4       | 45.33                           | 0.0110                          | 0.2088                          | 1.016                    | 46.2   | 99.9               | 299.99 | 0.38          |
| 43                                                                                                                                        | 3.5     | 49.34                           | 0.0007                          | 0.6769                          | 0.711                    | 743.3  | 99.6               | 323.5  | 1.5           |
| 93                                                                                                                                        | 4       | 50.86                           | 0.0432                          | 0.7735                          | 0.121                    | 11.8   | 99.6               | 332.5  | 3.3           |
| 92                                                                                                                                        | 4       | 51.50                           | -0.0216                         | 2.629                           | 0.224                    | -      | 98.5               | 333.0  | 1.8           |
| 67                                                                                                                                        | 4       | 52.53                           | 0.0172                          | 2.107                           | 0.121                    | 29.7   | 98.8               | 340.1  | 4.0           |
| 250                                                                                                                                       | 4       | 53.38                           | -0.0035                         | 0.4719                          | 0.509                    | -      | 99.7               | 348.12 | 0.80          |
| 89                                                                                                                                        | 4       | 53.40                           | -0.0005                         | 0.4392                          | 0.421                    | -      | 99.8               | 348.26 | 0.95          |
| 54                                                                                                                                        | 3.5     | 54.66                           | -0.0006                         | 1.116                           | 0.840                    | -      | 99.4               | 354.5  | 1.2           |
| 254                                                                                                                                       | 4       | 54.48                           | -0.0046                         | 0.4851                          | 0.837                    | -      | 99.7               | 354.62 | 0.50          |
| 168                                                                                                                                       | 4       | 55.67                           | 0.0011                          | 0.2959                          | 0.402                    | 445.9  | 99.8               | 362.0  | 1.3           |
| 200                                                                                                                                       | 4       | 56.63                           | 0.0016                          | 1.627                           | 0.348                    | 311.6  | 99.2               | 365.3  | 1.1           |
| 47                                                                                                                                        | 3.5     | 57.86                           | 0.0113                          | 0.9978                          | 0.671                    | 45.1   | 99.5               | 373.7  | 1.5           |
| 01                                                                                                                                        | 3.5     | 58.31                           | 0.0121                          | 0.4697                          | 0.569                    | 42.0   | 99.8               | 377.2  | 1.9           |
| 221                                                                                                                                       | 4       | 58.44                           | 0.0014                          | 0.3696                          | 0.691                    | 355.5  | 99.8               | 378.16 | 0.62          |
| 140                                                                                                                                       | 4       | 59.08                           | 0.0027                          | 0.2718                          | 0.528                    | 187.7  | 99.9               | 382.07 | 0.79          |
| 44                                                                                                                                        | 3.5     | 59.45                           | 0.0005                          | 0.3016                          | 0.440                    | 988.8  | 99.9               | 384.2  | 2.4           |
| 130                                                                                                                                       | 4       | 63.07                           | 0.0032                          | 0.3513                          | 0.661                    | 157.2  | 99.8               | 405.10 | 0.70          |
| 217                                                                                                                                       | 4       | 63.80                           | 0.0025                          | 0.3952                          | 0.936                    | 201.7  | 99.8               | 409.26 | 0.57          |
| 22                                                                                                                                        | 3.5     | 65.80                           | 0.0007                          | 0.9572                          | 0.705                    | 727.6  | 99.6               | 419.8  | 1.9           |
| 57                                                                                                                                        | 3.5     | 66.31                           | -0.0292                         | 0.8923                          | 0.168                    | -      | 99.6               | 422.8  | 6.9           |
| 139                                                                                                                                       | 4       | 67.87                           | -0.0015                         | 0.6755                          | 0.831                    | -      | 99.7               | 432.09 | 0.67          |
| 102                                                                                                                                       | 4       | 67.78                           | 0.0070                          | 0.1822                          | 0.503                    | 72.6   | 99.9               | 432.4  | 1.2           |
| 149                                                                                                                                       | 4       | 68.80                           | -0.0351                         | 1.704                           | 0.046                    | -      | 99.3               | 435.6  | 9.5           |
| 202                                                                                                                                       | 4       | 68.55                           | -0.0006                         | 0.3764                          | 0.358                    | -      | 99.8               | 436.5  | 1.5           |
| 216                                                                                                                                       | 4       | 68.67                           | 0.0039                          | 0.3721                          | 0.357                    | 131.6  | 99.8               | 437.1  | 1.3           |
| 73                                                                                                                                        | 4       | 68.93                           | 0.0178                          | 0.5944                          | 0.199                    | 28.6   | 99.7               | 438.3  | 2.7           |
| 103                                                                                                                                       | 4       | 69.04                           | 0.0057                          | 0.5094                          | 0.770                    | 90.3   | 99.8               | 438.98 | 0.83          |
| 30                                                                                                                                        | 3.5     | 69.09                           | -0.0208                         | 0.3609                          | 0.217                    | -      | 99.8               | 439.5  | 5.2           |
| 77                                                                                                                                        | 4       | 69.58                           | 0.0199                          | 0.5269                          | 0.454                    | 25.6   | 99.8               | 442.02 | 0.97          |
| 210                                                                                                                                       | 4       | 72.85                           | 0.0128                          | 0.2273                          | 0.573                    | 39.8   | 99.9               | 461.0  | 1.3           |
| 29                                                                                                                                        | 3.5     | 73.53                           | 0.0015                          | 0.1622                          | 0.657                    | 339.7  | 99.9               | 464.8  | 1.9           |
| 194                                                                                                                                       | 4       | 74.66                           | -0.0014                         | 0.2549                          | 0.743                    | -      | 99.9               | 470.99 | 0.88          |
| 187                                                                                                                                       | 4       | 76.35                           | 0.0192                          | 0.8166                          | 0.529                    | 26.6   | 99.7               | 479.4  | 1.1           |
| 156                                                                                                                                       | 4       | 76.36                           | 0.0062                          | 0.8014                          | 0.550                    | 82.8   | 99.7               | 479.56 | 0.90          |
| 11                                                                                                                                        | 3.5     | 76.83                           | 0.0036                          | 0.8368                          | 0.449                    | 140.2  | 99.7               | 482.1  | 3.2           |
| 243                                                                                                                                       | 4       | 77.41                           | 0.0075                          | 0.2688                          | 1.052                    | 68.0   | 99.9               | 486.21 | 0.72          |
| 13                                                                                                                                        | 3.5     | 77.58                           | 0.0056                          | 0.5558                          | 0.589                    | 91.8   | 99.8               | 486.7  | 2.5           |
| 132                                                                                                                                       | 4       | 78.82                           | 0.0005                          | 0.9512                          | 0.843                    | 1133.0 | 99.6               | 492.85 | 0.77          |
| 74                                                                                                                                        | 4       | 79.39                           | -0.0011                         | 0.1751                          | 0.885                    | -      | 99.9               | 497.29 | 0.72          |
| 127                                                                                                                                       | 4       | 80.59                           | 0.0037                          | 0.4059                          | 0.596                    | 137.4  | 99.9               | 503.5  | 1.0           |
| 223                                                                                                                                       | 4       | 84.59                           | 0.0079                          | 0.6509                          | 0.464                    | 64.9   | 99.8               | 524.8  | 1.3           |
| 257                                                                                                                                       | 4       | 85.28                           | 0.0098                          | 0.3487                          | 0.604                    | 51.9   | 99.9               | 529.0  | 1.1           |
| 196                                                                                                                                       | 4       | 86.91                           | 0.0021                          | 1.075                           | 0.697                    | 246.7  | 99.6               | 536.7  | 1.2           |
| 242                                                                                                                                       | 4       | 89.96                           | 0.0089                          | 0.9046                          | 0.222                    | 57.1   | 99.7               | 553.3  | 3.2           |

Argon data for Wirt member samples.

| ID                                                                                                                                        | Power   | $^{40}\text{Ar}/^{39}\text{Ar}$ | $^{37}\text{Ar}/^{39}\text{Ar}$ | $^{36}\text{Ar}/^{39}\text{Ar}$ | $^{39}\text{Ar}_K$       | K/Ca   | $^{40}\text{Ar}^*$ | Age    | $\pm 1\sigma$ |
|-------------------------------------------------------------------------------------------------------------------------------------------|---------|---------------------------------|---------------------------------|---------------------------------|--------------------------|--------|--------------------|--------|---------------|
|                                                                                                                                           | (watts) |                                 |                                 | ( $\times 10^{-3}$ )            | ( $\times 10^{-15}$ mol) |        | (%)                | (Ma)   | (Ma)          |
| <b>6-2-15-C, Sanidine/Microcline, J=0.0039346<math>\pm</math>0.01%, IC=1.00454<math>\pm</math>0.002106, NM-284C, Lab#=65071, Argus VI</b> |         |                                 |                                 |                                 |                          |        |                    |        |               |
| 42                                                                                                                                        | 3.5     | 90.17                           | 0.0128                          | 0.9540                          | 0.463                    | 40.0   | 99.7               | 554.3  | 2.7           |
| 186                                                                                                                                       | 4       | 90.29                           | 0.0027                          | 1.108                           | 0.490                    | 186.3  | 99.6               | 554.7  | 1.2           |
| 201                                                                                                                                       | 4       | 90.48                           | -0.0016                         | 0.2993                          | 1.223                    | -      | 99.9               | 556.94 | 0.61          |
| 61                                                                                                                                        | 4       | 90.88                           | 0.0129                          | 0.3949                          | 0.199                    | 39.4   | 99.9               | 559.0  | 3.5           |
| 53                                                                                                                                        | 3.5     | 91.86                           | -0.0018                         | 0.8327                          | 0.847                    | -      | 99.7               | 563.4  | 1.5           |
| 76                                                                                                                                        | 4       | 91.92                           | 0.0050                          | 0.6725                          | 0.547                    | 101.7  | 99.8               | 564.0  | 1.1           |
| 55                                                                                                                                        | 3.5     | 93.03                           | -0.0124                         | 0.2522                          | 0.480                    | -      | 99.9               | 570.5  | 2.4           |
| 120                                                                                                                                       | 4       | 94.47                           | 0.0093                          | 0.8843                          | 0.522                    | 54.7   | 99.7               | 577.1  | 1.5           |
| 98                                                                                                                                        | 4       | 94.60                           | 0.0156                          | 0.1653                          | 0.409                    | 32.6   | 99.9               | 578.9  | 1.7           |
| 68                                                                                                                                        | 4       | 96.06                           | 0.0013                          | 1.174                           | 0.688                    | 392.9  | 99.6               | 585.0  | 1.2           |
| 16                                                                                                                                        | 3.5     | 97.51                           | 0.0024                          | 0.7783                          | 0.239                    | 212.8  | 99.8               | 593.2  | 5.5           |
| 143                                                                                                                                       | 4       | 98.78                           | 0.0126                          | 1.060                           | 0.450                    | 40.6   | 99.7               | 599.4  | 1.5           |
| 240                                                                                                                                       | 4       | 98.64                           | 0.0037                          | 0.3974                          | 0.371                    | 138.2  | 99.9               | 599.6  | 2.0           |
| 37                                                                                                                                        | 3.5     | 98.87                           | 0.0118                          | 0.8012                          | 0.386                    | 43.2   | 99.8               | 600.3  | 4.2           |
| 06                                                                                                                                        | 3.5     | 100.7                           | -0.0052                         | 0.6011                          | 0.631                    | -      | 99.8               | 610.2  | 2.5           |
| 125                                                                                                                                       | 4       | 103.9                           | 0.0782                          | 1.219                           | 0.139                    | 6.5    | 99.7               | 625.7  | 4.7           |
| 154                                                                                                                                       | 4       | 104.0                           | 0.0029                          | 0.3093                          | 0.951                    | 174.4  | 99.9               | 627.35 | 0.83          |
| 241                                                                                                                                       | 4       | 104.1                           | 0.0065                          | 0.6867                          | 1.081                    | 78.0   | 99.8               | 627.57 | 0.73          |
| 134                                                                                                                                       | 4       | 104.1                           | -0.0085                         | 0.4722                          | 0.477                    | -      | 99.9               | 627.8  | 1.9           |
| 209                                                                                                                                       | 4       | 105.8                           | 0.0077                          | 0.2639                          | 0.627                    | 66.4   | 99.9               | 636.8  | 1.2           |
| 153                                                                                                                                       | 4       | 108.0                           | 0.0045                          | 0.3406                          | 0.905                    | 113.8  | 99.9               | 647.63 | 0.95          |
| 214                                                                                                                                       | 4       | 108.3                           | 0.0444                          | 0.9579                          | 0.222                    | 11.5   | 99.7               | 648.3  | 3.5           |
| 176                                                                                                                                       | 4       | 109.3                           | 0.0030                          | 0.5999                          | 0.527                    | 169.9  | 99.8               | 654.1  | 1.4           |
| 75                                                                                                                                        | 4       | 109.8                           | 0.0028                          | 0.6347                          | 0.290                    | 185.4  | 99.8               | 656.2  | 2.0           |
| 49                                                                                                                                        | 3.5     | 110.3                           | 0.0027                          | 0.4702                          | 0.786                    | 187.9  | 99.9               | 659.0  | 2.1           |
| 18                                                                                                                                        | 3.5     | 110.3                           | 0.0024                          | 0.2730                          | 0.513                    | 208.6  | 99.9               | 659.2  | 2.8           |
| 212                                                                                                                                       | 4       | 111.4                           | 0.0182                          | 0.5197                          | 0.352                    | 28.0   | 99.9               | 664.4  | 1.9           |
| 182                                                                                                                                       | 4       | 113.0                           | -0.0133                         | 1.530                           | 0.551                    | -      | 99.6               | 671.3  | 1.6           |
| 167                                                                                                                                       | 4       | 115.1                           | 0.0074                          | 0.3228                          | 0.919                    | 68.6   | 99.9               | 683.2  | 1.0           |
| 188                                                                                                                                       | 4       | 116.4                           | 0.0066                          | 0.7572                          | 0.649                    | 77.6   | 99.8               | 689.1  | 1.4           |
| 97                                                                                                                                        | 4       | 117.7                           | 0.0059                          | 0.2372                          | 0.517                    | 86.5   | 99.9               | 696.4  | 1.5           |
| 144                                                                                                                                       | 4       | 119.4                           | 0.0079                          | 0.3684                          | 0.448                    | 64.8   | 99.9               | 704.4  | 1.7           |
| 62                                                                                                                                        | 4       | 119.7                           | 0.0118                          | 0.8105                          | 0.822                    | 43.3   | 99.8               | 705.0  | 1.1           |
| 148                                                                                                                                       | 4       | 120.0                           | -0.0034                         | 0.3435                          | 0.694                    | -      | 99.9               | 707.1  | 1.1           |
| 21                                                                                                                                        | 3.5     | 120.6                           | -0.0036                         | 1.085                           | 0.418                    | -      | 99.7               | 709.2  | 3.4           |
| 239                                                                                                                                       | 4       | 122.0                           | 0.0154                          | 1.742                           | 0.144                    | 33.1   | 99.6               | 714.9  | 5.1           |
| 226                                                                                                                                       | 4       | 124.0                           | 0.0136                          | 0.3948                          | 0.438                    | 37.6   | 99.9               | 726.9  | 2.2           |
| 231                                                                                                                                       | 4       | 124.9                           | 0.0023                          | 0.1990                          | 0.804                    | 218.8  | 100.0              | 731.3  | 1.2           |
| 32                                                                                                                                        | 3.5     | 125.9                           | 0.0004                          | 0.3513                          | 0.534                    | 1229.7 | 99.9               | 736.2  | 3.0           |
| 170                                                                                                                                       | 4       | 127.6                           | 0.0091                          | 0.1791                          | 0.689                    | 55.9   | 100.0              | 744.3  | 1.2           |
| 256                                                                                                                                       | 4       | 129.0                           | 0.0020                          | 0.6124                          | 0.720                    | 254.6  | 99.9               | 750.3  | 1.3           |
| 31                                                                                                                                        | 3.5     | 131.9                           | -0.0047                         | 0.9391                          | 0.554                    | -      | 99.8               | 764.1  | 3.0           |
| 86                                                                                                                                        | 4       | 133.2                           | 0.0007                          | 0.1805                          | 0.860                    | 726.8  | 100.0              | 771.3  | 1.1           |
| 123                                                                                                                                       | 4       | 133.9                           | 0.0002                          | 0.5858                          | 0.716                    | 3285.3 | 99.9               | 773.9  | 1.5           |
| 121                                                                                                                                       | 4       | 134.8                           | -0.0043                         | 1.197                           | 0.378                    | -      | 99.7               | 777.0  | 2.1           |
| 179                                                                                                                                       | 4       | 135.5                           | 0.0139                          | 0.7023                          | 0.302                    | 36.8   | 99.8               | 781.3  | 3.0           |
| 248                                                                                                                                       | 4       | 136.0                           | 0.0163                          | 0.1815                          | 0.452                    | 31.4   | 100.0              | 784.1  | 1.6           |
| 207                                                                                                                                       | 4       | 137.3                           | 0.0119                          | 1.241                           | 0.174                    | 42.7   | 99.7               | 788.8  | 5.9           |
| 232                                                                                                                                       | 4       | 140.0                           | 0.0070                          | 0.2287                          | 0.836                    | 73.1   | 100.0              | 802.9  | 1.0           |
| 173                                                                                                                                       | 4       | 140.3                           | 0.0079                          | 1.079                           | 0.820                    | 64.8   | 99.8               | 803.3  | 1.2           |
| 218                                                                                                                                       | 4       | 143.4                           | -0.0238                         | 0.3509                          | 0.176                    | -      | 99.9               | 818.6  | 4.9           |
| 136                                                                                                                                       | 4       | 144.3                           | 0.0007                          | 0.5972                          | 1.053                    | 768.6  | 99.9               | 822.43 | 0.96          |
| 63                                                                                                                                        | 4       | 145.1                           | -0.0085                         | 0.6781                          | 0.164                    | -      | 99.9               | 825.7  | 4.0           |
| 141                                                                                                                                       | 4       | 145.5                           | 0.0009                          | 1.271                           | 0.396                    | 586.4  | 99.7               | 827.0  | 2.1           |



Argon data for Wirt member samples.

| ID                                                                                                                                        | Power   | $^{40}\text{Ar}/^{39}\text{Ar}$ | $^{37}\text{Ar}/^{39}\text{Ar}$ | $^{36}\text{Ar}/^{39}\text{Ar}$ | $^{39}\text{Ar}_K$       | K/Ca   | $^{40}\text{Ar}^*$ | Age     | $\pm 1\sigma$ |
|-------------------------------------------------------------------------------------------------------------------------------------------|---------|---------------------------------|---------------------------------|---------------------------------|--------------------------|--------|--------------------|---------|---------------|
|                                                                                                                                           | (watts) |                                 |                                 | ( $\times 10^{-3}$ )            | ( $\times 10^{-15}$ mol) |        | (%)                | (Ma)    | (Ma)          |
| <b>6-2-15-C, Sanidine/Microcline, J=0.0039346<math>\pm</math>0.01%, IC=1.00454<math>\pm</math>0.002106, NM-284C, Lab#=65071, Argus VI</b> |         |                                 |                                 |                                 |                          |        |                    |         |               |
| 163                                                                                                                                       | 4       | 146.0                           | 0.0054                          | 0.8286                          | 0.177                    | 95.2   | 99.8               | 829.6   | 5.7           |
| 20                                                                                                                                        | 3.5     | 147.8                           | 0.0060                          | 0.5952                          | 0.415                    | 84.5   | 99.9               | 838.3   | 5.0           |
| 185                                                                                                                                       | 4       | 150.1                           | -0.0048                         | 0.6639                          | 0.713                    | -      | 99.9               | 848.6   | 1.4           |
| 262                                                                                                                                       | 4       | 150.3                           | 0.0005                          | 0.9975                          | 0.459                    | 971.4  | 99.8               | 849.1   | 1.7           |
| 184                                                                                                                                       | 4       | 151.9                           | 0.0060                          | 0.4124                          | 0.719                    | 85.3   | 99.9               | 857.3   | 1.4           |
| 146                                                                                                                                       | 4       | 152.4                           | 0.0079                          | 0.9429                          | 0.671                    | 64.5   | 99.8               | 858.8   | 1.7           |
| 258                                                                                                                                       | 4       | 154.1                           | 0.0154                          | 1.106                           | 0.537                    | 33.1   | 99.8               | 866.2   | 1.6           |
| 36                                                                                                                                        | 3.5     | 154.2                           | 0.0025                          | 0.3466                          | 0.654                    | 205.0  | 99.9               | 867.6   | 3.4           |
| 255                                                                                                                                       | 4       | 155.5                           | -0.0161                         | 1.060                           | 0.279                    | -      | 99.8               | 872.3   | 3.3           |
| 162                                                                                                                                       | 4       | 156.1                           | 0.0057                          | 0.2995                          | 0.570                    | 90.3   | 99.9               | 876.1   | 1.7           |
| 224                                                                                                                                       | 4       | 157.6                           | -0.0034                         | 1.234                           | 0.143                    | -      | 99.8               | 881.7   | 5.5           |
| 229                                                                                                                                       | 4       | 163.1                           | 0.0377                          | 0.6852                          | 0.126                    | 13.5   | 99.9               | 906.5   | 7.2           |
| 263                                                                                                                                       | 4       | 163.3                           | 0.0038                          | 0.1611                          | 0.702                    | 132.6  | 100.0              | 908.1   | 1.1           |
| 234                                                                                                                                       | 4       | 164.4                           | 0.0181                          | 0.3263                          | 0.389                    | 28.1   | 99.9               | 912.7   | 3.0           |
| 191                                                                                                                                       | 4       | 166.2                           | 0.0086                          | 0.3178                          | 0.636                    | 59.2   | 99.9               | 920.6   | 1.6           |
| 181                                                                                                                                       | 4       | 167.1                           | 0.0034                          | 0.4724                          | 1.018                    | 150.6  | 99.9               | 924.27  | 0.94          |
| 88                                                                                                                                        | 4       | 167.8                           | 0.0039                          | 0.4256                          | 0.546                    | 130.5  | 99.9               | 927.5   | 1.6           |
| 65                                                                                                                                        | 4       | 172.7                           | 0.0048                          | 0.7298                          | 0.659                    | 106.6  | 99.9               | 948.2   | 1.5           |
| 174                                                                                                                                       | 4       | 174.9                           | 0.0017                          | 0.1774                          | 0.643                    | 304.2  | 100.0              | 958.4   | 1.8           |
| 106                                                                                                                                       | 4       | 175.4                           | -0.0009                         | 0.2287                          | 0.937                    | -      | 100.0              | 960.3   | 1.3           |
| 152                                                                                                                                       | 4       | 176.0                           | -0.0104                         | 0.5496                          | 0.285                    | -      | 99.9               | 962.3   | 2.3           |
| 109                                                                                                                                       | 4       | 176.6                           | -0.0033                         | 1.146                           | 0.359                    | -      | 99.8               | 964.1   | 3.0           |
| 151                                                                                                                                       | 4       | 177.4                           | 0.0004                          | 0.2727                          | 0.753                    | 1145.5 | 100.0              | 968.8   | 1.4           |
| 227                                                                                                                                       | 4       | 179.9                           | 0.0099                          | 0.1708                          | 0.370                    | 51.3   | 100.0              | 979.4   | 2.4           |
| 51                                                                                                                                        | 3.5     | 181.2                           | 0.0131                          | 0.2976                          | 0.357                    | 38.8   | 100.0              | 985.0   | 5.5           |
| 90                                                                                                                                        | 4       | 181.5                           | 0.0026                          | 0.4511                          | 0.474                    | 197.9  | 99.9               | 986.1   | 2.4           |
| 41                                                                                                                                        | 3.5     | 181.9                           | -0.0050                         | 0.1970                          | 0.398                    | -      | 100.0              | 987.7   | 5.5           |
| 138                                                                                                                                       | 4       | 182.1                           | 0.0066                          | 0.1952                          | 1.057                    | 76.9   | 100.0              | 988.9   | 1.0           |
| 66                                                                                                                                        | 4       | 182.7                           | 0.0002                          | 0.4316                          | 0.818                    | 2419.2 | 99.9               | 990.8   | 1.4           |
| 220                                                                                                                                       | 4       | 185.4                           | -0.0024                         | 0.9051                          | 0.529                    | -      | 99.9               | 1001.8  | 1.6           |
| 99                                                                                                                                        | 4       | 185.7                           | 0.0046                          | 0.1959                          | 0.734                    | 110.8  | 100.0              | 1003.8  | 1.4           |
| 04                                                                                                                                        | 3.5     | 187.0                           | 0.0101                          | 0.3571                          | 0.305                    | 50.3   | 99.9               | 1009.0  | 5.6           |
| 27                                                                                                                                        | 3.5     | 188.1                           | -0.0017                         | 0.3598                          | 0.238                    | -      | 99.9               | 1013.5  | 8.3           |
| 249                                                                                                                                       | 4       | 189.1                           | 0.0094                          | 0.6144                          | 0.431                    | 54.0   | 99.9               | 1017.3  | 3.0           |
| 91                                                                                                                                        | 4       | 189.9                           | 0.0139                          | 0.1457                          | 0.605                    | 36.8   | 100.0              | 1021.1  | 1.7           |
| 10                                                                                                                                        | 3.5     | 190.3                           | -0.0042                         | 1.319                           | 0.478                    | -      | 99.8               | 1021.4  | 4.8           |
| 07                                                                                                                                        | 3.5     | 192.2                           | 0.0142                          | 0.6368                          | 0.410                    | 36.0   | 99.9               | 1029.9  | 4.8           |
| 175                                                                                                                                       | 4       | 192.5                           | -0.0153                         | 0.7921                          | 0.237                    | -      | 99.9               | 1031.1  | 4.5           |
| 50                                                                                                                                        | 3.5     | 199.2                           | 0.0080                          | 1.099                           | 0.424                    | 63.9   | 99.8               | 1058.1  | 4.5           |
| 208                                                                                                                                       | 4       | 202.2                           | 0.0043                          | 0.6696                          | 0.346                    | 119.5  | 99.9               | 1070.6  | 3.4           |
| 178                                                                                                                                       | 4       | 203.2                           | 0.0048                          | 0.4323                          | 0.574                    | 106.4  | 99.9               | 1074.8  | 2.1           |
| 245                                                                                                                                       | 4       | 204.6                           | 0.0157                          | 0.9953                          | 0.407                    | 32.4   | 99.9               | 1079.7  | 2.5           |
| 119                                                                                                                                       | 4       | 206.9                           | 0.0027                          | 0.2614                          | 0.314                    | 186.3  | 100.0              | 1090.0  | 4.7           |
| 157                                                                                                                                       | 4       | 208.1                           | -0.0077                         | 0.2439                          | 0.572                    | -      | 100.0              | 1094.6  | 1.7           |
| 33                                                                                                                                        | 3.5     | 209.1                           | 0.0053                          | 0.6822                          | 0.326                    | 95.5   | 99.9               | 1097.9  | 7.0           |
| 206                                                                                                                                       | 4       | 215.8                           | 0.0022                          | 0.4219                          | 0.730                    | 236.3  | 99.9               | 1124.6  | 1.7           |
| 233                                                                                                                                       | 4       | 215.8                           | -0.0080                         | 0.2836                          | 0.627                    | -      | 100.0              | 1125.0  | 1.4           |
| 95                                                                                                                                        | 4       | 217.4                           | 0.0335                          | 0.0851                          | 0.185                    | 15.2   | 100.0              | 1131.5  | 6.4           |
| 70                                                                                                                                        | 4       | 217.5                           | 0.0041                          | 0.1035                          | 0.947                    | 125.7  | 100.0              | 1131.64 | 0.99          |
| 197                                                                                                                                       | 4       | 220.3                           | -0.0014                         | 0.3726                          | 0.446                    | -      | 100.0              | 1142.1  | 2.4           |
| 158                                                                                                                                       | 4       | 222.1                           | 0.0095                          | 0.2134                          | 0.860                    | 53.9   | 100.0              | 1149.1  | 1.4           |
| 122                                                                                                                                       | 4       | 224.8                           | 0.0074                          | 0.4431                          | 0.510                    | 68.7   | 99.9               | 1159.5  | 2.3           |
| 199                                                                                                                                       | 4       | 232.5                           | -0.0007                         | 0.2151                          | 0.484                    | -      | 100.0              | 1189.0  | 2.7           |
| 247                                                                                                                                       | 4       | 233.3                           | -0.0081                         | 0.4220                          | 0.246                    | -      | 99.9               | 1191.7  | 5.0           |

Argon data for Wirt member samples.

| ID                                                                                                                                          | Power   | $^{40}\text{Ar}/^{39}\text{Ar}$ | $^{37}\text{Ar}/^{39}\text{Ar}$ | $^{36}\text{Ar}/^{39}\text{Ar}$ | $^{39}\text{Ar}_K$       | K/Ca  | $^{40}\text{Ar}^*$ | Age    | $\pm 1\sigma$ |
|---------------------------------------------------------------------------------------------------------------------------------------------|---------|---------------------------------|---------------------------------|---------------------------------|--------------------------|-------|--------------------|--------|---------------|
|                                                                                                                                             | (watts) |                                 |                                 | ( $\times 10^{-3}$ )            | ( $\times 10^{-15}$ mol) |       | (%)                | (Ma)   | (Ma)          |
| <b>6-2-15-C, Sanidine/Microcline, J=0.0039346<math>\pm</math>0.01%, IC=1.00454<math>\pm</math>0.002106, NM-284C, Lab#=65071, Argus VI</b>   |         |                                 |                                 |                                 |                          |       |                    |        |               |
| 177                                                                                                                                         | 4       | 233.6                           | 0.0071                          | 0.2912                          | 0.646                    | 71.4  | 100.0              | 1192.8 | 1.7           |
| 189                                                                                                                                         | 4       | 237.9                           | -0.0122                         | 0.4312                          | 0.297                    | -     | 99.9               | 1208.9 | 3.7           |
| 147                                                                                                                                         | 4       | 240.6                           | -0.0010                         | 1.614                           | 0.855                    | -     | 99.8               | 1217.7 | 1.3           |
| 260                                                                                                                                         | 4       | 240.4                           | 0.0058                          | 0.4412                          | 0.350                    | 88.7  | 99.9               | 1218.1 | 3.3           |
| 116                                                                                                                                         | 4       | 242.1                           | 0.0081                          | 0.7807                          | 0.669                    | 62.9  | 99.9               | 1224.0 | 1.6           |
| 14                                                                                                                                          | 3.5     | 242.6                           | 0.0019                          | 0.4071                          | 0.604                    | 272.4 | 100.0              | 1226.3 | 4.6           |
| 02                                                                                                                                          | 3.5     | 255.7                           | 0.0017                          | 0.0861                          | 0.926                    | 307.5 | 100.0              | 1274.4 | 3.1           |
| 25                                                                                                                                          | 3.5     | 272.7                           | 0.0157                          | 3.615                           | 0.318                    | 32.4  | 99.6               | 1330.6 | 8.6           |
| 39                                                                                                                                          | 3.5     | 276.4                           | -0.0086                         | 0.1593                          | 0.572                    | -     | 100.0              | 1346.9 | 4.4           |
| 12                                                                                                                                          | 3.5     | 279.5                           | 0.0036                          | 0.2486                          | 0.687                    | 143.6 | 100.0              | 1357.6 | 4.3           |
| 114                                                                                                                                         | 4       | 290.1                           | 0.0115                          | 1.034                           | 0.168                    | 44.2  | 99.9               | 1392.8 | 6.6           |
| 131                                                                                                                                         | 4       | 296.0                           | 0.0098                          | 3.878                           | 0.084                    | 52.0  | 99.6               | 1409.9 | 14.4          |
| 112                                                                                                                                         | 4       | 319.3                           | -0.0103                         | 3.797                           | 0.092                    | -     | 99.6               | 1486.0 | 14.3          |
| <b>6-2-15-C, Sanidine/Microcline, J=0.0037788<math>\pm</math>0.01%, IC=1.006702<math>\pm</math>0.0010652, NM-289F, Lab#=65506, Argus VI</b> |         |                                 |                                 |                                 |                          |       |                    |        |               |
| 26                                                                                                                                          | 5       | 9.633                           | 0.0043                          | 0.0525                          | 0.417                    | 118.8 | 99.8               | 65.293 | 0.088         |
| 35                                                                                                                                          | 5       | 9.789                           | 0.0039                          | 0.5317                          | 0.148                    | 131.6 | 98.4               | 65.39  | 0.25          |
| 55                                                                                                                                          | 5       | 9.701                           | 0.0027                          | 0.0495                          | 0.327                    | 186.8 | 99.9               | 65.75  | 0.12          |
| 47                                                                                                                                          | 5       | 9.720                           | 0.0064                          | 0.0525                          | 0.434                    | 79.3  | 99.8               | 65.877 | 0.087         |
| 82                                                                                                                                          | 5       | 9.924                           | 0.0108                          | 0.0491                          | 0.121                    | 47.2  | 99.9               | 67.24  | 0.31          |
| 01                                                                                                                                          | 5       | 11.12                           | 0.0182                          | 1.341                           | 0.124                    | 28.1  | 96.5               | 72.70  | 0.32          |
| 79                                                                                                                                          | 5       | 10.80                           | 0.0093                          | 0.2137                          | 0.123                    | 54.9  | 99.4               | 72.73  | 0.32          |
| 45                                                                                                                                          | 5       | 10.79                           | 0.0042                          | 0.0218                          | 0.603                    | 122.8 | 99.9               | 73.065 | 0.068         |
| 13                                                                                                                                          | 5       | 10.84                           | 0.0058                          | 0.1110                          | 0.142                    | 88.1  | 99.7               | 73.19  | 0.27          |
| 54                                                                                                                                          | 5       | 10.86                           | 0.0071                          | 0.0389                          | 0.494                    | 72.2  | 99.9               | 73.484 | 0.086         |
| 02                                                                                                                                          | 5       | 10.91                           | 0.0068                          | 0.1277                          | 0.523                    | 74.9  | 99.7               | 73.648 | 0.081         |
| 80                                                                                                                                          | 5       | 10.90                           | 0.0067                          | 0.0514                          | 0.319                    | 76.2  | 99.9               | 73.71  | 0.13          |
| 32                                                                                                                                          | 5       | 10.94                           | 0.0046                          | 0.0371                          | 0.341                    | 110.0 | 99.9               | 74.01  | 0.12          |
| 108                                                                                                                                         | 5       | 10.96                           | 0.0069                          | -0.0384                         | 0.495                    | 73.8  | 100.1              | 74.288 | 0.086         |
| 05                                                                                                                                          | 5       | 11.00                           | 0.0041                          | 0.0943                          | 0.538                    | 124.6 | 99.7               | 74.337 | 0.079         |
| 72                                                                                                                                          | 5       | 11.05                           | 0.0065                          | 0.2372                          | 0.704                    | 78.2  | 99.4               | 74.346 | 0.063         |
| 37                                                                                                                                          | 5       | 11.33                           | -0.0100                         | 1.149                           | 0.066                    | -     | 97.0               | 74.41  | 0.61          |
| 91                                                                                                                                          | 5       | 10.96                           | 0.0264                          | -0.1337                         | 0.059                    | 19.3  | 100.4              | 74.50  | 0.66          |
| 109                                                                                                                                         | 5       | 11.02                           | 0.0049                          | 0.0167                          | 0.423                    | 104.3 | 100.0              | 74.590 | 0.097         |
| 12                                                                                                                                          | 5       | 11.06                           | 0.0092                          | 0.1291                          | 0.334                    | 55.6  | 99.7               | 74.62  | 0.13          |
| 16                                                                                                                                          | 5       | 11.07                           | 0.0067                          | 0.1664                          | 0.389                    | 76.0  | 99.6               | 74.64  | 0.10          |
| 89                                                                                                                                          | 5       | 11.07                           | 0.0062                          | 0.0909                          | 0.378                    | 82.9  | 99.8               | 74.81  | 0.11          |
| 62                                                                                                                                          | 5       | 11.09                           | 0.0029                          | 0.0261                          | 0.556                    | 179.0 | 99.9               | 75.038 | 0.075         |
| 06                                                                                                                                          | 5       | 11.23                           | 0.0008                          | 0.1057                          | 0.160                    | 619.7 | 99.7               | 75.80  | 0.25          |
| 11                                                                                                                                          | 5       | 11.23                           | 0.0049                          | 0.0789                          | 0.455                    | 103.2 | 99.8               | 75.876 | 0.093         |
| 61                                                                                                                                          | 5       | 11.23                           | 0.0091                          | 0.0526                          | 0.290                    | 55.9  | 99.9               | 75.92  | 0.14          |
| 18                                                                                                                                          | 5       | 11.24                           | 0.0071                          | 0.0504                          | 0.589                    | 71.9  | 99.9               | 76.010 | 0.069         |
| 63                                                                                                                                          | 5       | 11.26                           | 0.0062                          | 0.0573                          | 0.601                    | 82.8  | 99.9               | 76.080 | 0.069         |
| 85                                                                                                                                          | 5       | 11.27                           | 0.0040                          | 0.1009                          | 0.434                    | 128.8 | 99.7               | 76.090 | 0.095         |
| 03                                                                                                                                          | 5       | 11.28                           | 0.0044                          | 0.1193                          | 0.439                    | 116.3 | 99.7               | 76.096 | 0.096         |
| 10                                                                                                                                          | 5       | 11.26                           | 0.0042                          | 0.0251                          | 0.512                    | 122.3 | 99.9               | 76.166 | 0.085         |
| 65                                                                                                                                          | 5       | 11.30                           | 0.0067                          | -0.0008                         | 0.444                    | 76.0  | 100.0              | 76.480 | 0.095         |
| 103                                                                                                                                         | 5       | 11.27                           | 0.0111                          | -0.1738                         | 0.100                    | 45.9  | 100.5              | 76.62  | 0.40          |
| 92                                                                                                                                          | 5       | 11.35                           | 0.0155                          | 0.0583                          | 0.111                    | 33.0  | 99.9               | 76.74  | 0.40          |
| 43                                                                                                                                          | 5       | 11.43                           | 0.0065                          | 0.2994                          | 0.492                    | 78.0  | 99.2               | 76.781 | 0.090         |
| 88                                                                                                                                          | 5       | 11.43                           | 0.0185                          | 0.1799                          | 0.044                    | 27.6  | 99.5               | 77.03  | 0.97          |
| 83                                                                                                                                          | 5       | 11.47                           | 0.0033                          | 0.0465                          | 0.118                    | 154.7 | 99.9               | 77.55  | 0.33          |
| 39                                                                                                                                          | 5       | 11.50                           | 0.0046                          | 0.1188                          | 0.425                    | 111.0 | 99.7               | 77.60  | 0.10          |
| 07                                                                                                                                          | 5       | 11.56                           | 0.0091                          | 0.0009                          | 0.548                    | 56.4  | 100.0              | 78.182 | 0.075         |

Argon data for Wirt member samples.

| ID                                                                                                                                          | Power   | $^{40}\text{Ar}/^{39}\text{Ar}$ | $^{37}\text{Ar}/^{39}\text{Ar}$ | $^{36}\text{Ar}/^{39}\text{Ar}$ | $^{39}\text{Ar}_K$       | K/Ca   | $^{40}\text{Ar}^*$ | Age    | $\pm 1\sigma$ |
|---------------------------------------------------------------------------------------------------------------------------------------------|---------|---------------------------------|---------------------------------|---------------------------------|--------------------------|--------|--------------------|--------|---------------|
|                                                                                                                                             | (watts) |                                 |                                 | ( $\times 10^{-3}$ )            | ( $\times 10^{-15}$ mol) |        | (%)                | (Ma)   | (Ma)          |
| <b>6-2-15-C, Sanidine/Microcline, J=0.0037788<math>\pm</math>0.01%, IC=1.006702<math>\pm</math>0.0010652, NM-289F, Lab#=65506, Argus VI</b> |         |                                 |                                 |                                 |                          |        |                    |        |               |
| 56                                                                                                                                          | 5       | 11.63                           | 0.0012                          | 0.0411                          | 0.281                    | 429.7  | 99.9               | 78.59  | 0.15          |
| 76                                                                                                                                          | 5       | 12.05                           | 0.0049                          | 0.0611                          | 0.488                    | 103.9  | 99.9               | 81.335 | 0.096         |
| 44                                                                                                                                          | 5       | 12.26                           | 0.0039                          | 0.0505                          | 0.229                    | 130.2  | 99.9               | 82.75  | 0.20          |
| 107                                                                                                                                         | 5       | 12.26                           | 0.0006                          | 0.0259                          | 0.617                    | 909.3  | 99.9               | 82.771 | 0.082         |
| 25                                                                                                                                          | 5       | 12.75                           | 0.0060                          | 0.4535                          | 0.137                    | 84.9   | 99.0               | 85.19  | 0.32          |
| 104                                                                                                                                         | 5       | 13.43                           | -0.0744                         | 0.4772                          | 0.021                    | -      | 98.9               | 89.6   | 9.3           |
| 21                                                                                                                                          | 5       | 26.17                           | 0.0480                          | 1.119                           | 0.036                    | 10.6   | 98.8               | 170.5  | 10.9          |
| 52                                                                                                                                          | 5       | 27.63                           | 0.0032                          | 0.5998                          | 0.630                    | 160.3  | 99.4               | 180.62 | 0.94          |
| 71                                                                                                                                          | 5       | 28.04                           | -0.0033                         | 0.4283                          | 0.490                    | -      | 99.5               | 183.5  | 1.1           |
| 36                                                                                                                                          | 5       | 29.11                           | 0.0110                          | 0.2495                          | 0.388                    | 46.5   | 99.7               | 190.6  | 1.1           |
| 48                                                                                                                                          | 5       | 29.16                           | 0.0115                          | 0.1544                          | 0.767                    | 44.3   | 99.8               | 191.02 | 0.76          |
| 78                                                                                                                                          | 5       | 30.26                           | 0.0037                          | 0.3796                          | 0.570                    | 138.2  | 99.6               | 197.45 | 0.92          |
| 60                                                                                                                                          | 5       | 31.51                           | 0.0008                          | 0.1184                          | 0.307                    | 647.4  | 99.9               | 205.6  | 1.6           |
| 87                                                                                                                                          | 5       | 36.45                           | -0.0031                         | 0.1491                          | 0.391                    | -      | 99.9               | 235.9  | 1.4           |
| 31                                                                                                                                          | 5       | 37.55                           | 0.0103                          | 0.3111                          | 0.212                    | 49.5   | 99.8               | 242.3  | 2.4           |
| 53                                                                                                                                          | 5       | 43.24                           | -0.0006                         | 0.1296                          | 0.421                    | -      | 99.9               | 276.8  | 1.4           |
| 28                                                                                                                                          | 5       | 48.18                           | 0.0170                          | 0.1726                          | 0.103                    | 29.9   | 99.9               | 305.8  | 6.8           |
| 40                                                                                                                                          | 5       | 50.41                           | -0.0063                         | 0.3628                          | 0.304                    | -      | 99.8               | 318.5  | 2.7           |
| 58                                                                                                                                          | 5       | 52.40                           | -0.0057                         | 0.1559                          | 0.349                    | -      | 99.9               | 330.4  | 2.6           |
| 23                                                                                                                                          | 5       | 53.66                           | -0.0033                         | 0.2722                          | 0.438                    | -      | 99.8               | 337.5  | 2.5           |
| 46                                                                                                                                          | 5       | 54.90                           | -0.0085                         | 0.9034                          | 0.130                    | -      | 99.5               | 343.5  | 7.2           |
| 09                                                                                                                                          | 5       | 59.57                           | 0.0126                          | 0.1334                          | 0.199                    | 40.6   | 99.9               | 371.4  | 5.8           |
| 08                                                                                                                                          | 5       | 70.82                           | 0.0026                          | 0.3283                          | 0.228                    | 195.7  | 99.9               | 433.5  | 4.9           |
| 29                                                                                                                                          | 5       | 80.34                           | 0.0154                          | 0.9678                          | 0.381                    | 33.2   | 99.6               | 483.7  | 2.3           |
| 84                                                                                                                                          | 5       | 86.08                           | 0.0030                          | 0.9084                          | 0.876                    | 172.6  | 99.7               | 514.1  | 1.8           |
| 50                                                                                                                                          | 5       | 89.03                           | -0.0028                         | -0.0854                         | 0.263                    | -      | 100.0              | 530.9  | 3.4           |
| 20                                                                                                                                          | 5       | 90.19                           | 0.0025                          | 0.9166                          | 0.283                    | 203.3  | 99.7               | 535.4  | 4.1           |
| 04                                                                                                                                          | 5       | 92.81                           | -0.0003                         | 0.9228                          | 0.241                    | -      | 99.7               | 548.9  | 5.2           |
| 19                                                                                                                                          | 5       | 96.80                           | 0.0090                          | 0.3483                          | 0.439                    | 56.7   | 99.9               | 570.0  | 2.9           |
| 42                                                                                                                                          | 5       | 104.5                           | 0.0003                          | 1.409                           | 0.110                    | 1979.1 | 99.6               | 606.9  | 11.6          |
| 69                                                                                                                                          | 5       | 114.1                           | 0.0017                          | 0.1425                          | 0.815                    | 297.5  | 100.0              | 656.2  | 2.3           |
| 86                                                                                                                                          | 5       | 115.6                           | 0.0024                          | -0.0894                         | 0.747                    | 210.2  | 100.0              | 663.7  | 2.1           |
| 14                                                                                                                                          | 5       | 117.9                           | -0.0025                         | 0.1761                          | 0.797                    | -      | 100.0              | 674.4  | 2.3           |
| 15                                                                                                                                          | 5       | 127.5                           | 0.0017                          | 0.9547                          | 0.247                    | 308.7  | 99.8               | 718.3  | 6.9           |
| 110                                                                                                                                         | 5       | 127.8                           | 0.0003                          | 1.166                           | 0.102                    | 1597.9 | 99.7               | 719.8  | 15.7          |
| 67                                                                                                                                          | 5       | 134.1                           | 0.0026                          | 0.1168                          | 0.394                    | 193.0  | 100.0              | 750.0  | 5.1           |
| 75                                                                                                                                          | 5       | 135.9                           | 0.0022                          | 0.1823                          | 0.590                    | 230.5  | 100.0              | 758.2  | 2.7           |
| 27                                                                                                                                          | 5       | 136.5                           | 0.0039                          | 0.9210                          | 0.289                    | 132.1  | 99.8               | 760.3  | 6.0           |
| 33                                                                                                                                          | 5       | 137.7                           | 0.0000                          | 0.4580                          | 0.825                    | -      | 99.9               | 766.0  | 2.7           |
| 64                                                                                                                                          | 5       | 138.1                           | 0.0127                          | 0.5141                          | 0.282                    | 40.3   | 99.9               | 768.2  | 7.0           |
| 41                                                                                                                                          | 5       | 143.4                           | -0.0022                         | 0.4686                          | 0.216                    | -      | 99.9               | 792.1  | 10.2          |
| 106                                                                                                                                         | 5       | 147.6                           | 0.0012                          | 0.7354                          | 0.853                    | 409.2  | 99.9               | 810.2  | 2.5           |
| 30                                                                                                                                          | 5       | 149.1                           | 0.0017                          | 0.3689                          | 0.589                    | 306.7  | 99.9               | 817.7  | 3.8           |
| 17                                                                                                                                          | 5       | 151.0                           | 0.0026                          | 0.4521                          | 0.678                    | 192.8  | 99.9               | 825.7  | 2.9           |
| 34                                                                                                                                          | 5       | 165.2                           | 0.0045                          | 0.2735                          | 0.195                    | 113.0  | 100.0              | 887.5  | 11.6          |
| 93                                                                                                                                          | 5       | 171.6                           | -0.0008                         | 1.967                           | 0.675                    | -      | 99.7               | 912.4  | 2.8           |
| 51                                                                                                                                          | 5       | 187.7                           | 0.0029                          | 0.1893                          | 0.121                    | 177.1  | 100.0              | 981.0  | 16.2          |
| 74                                                                                                                                          | 5       | 191.9                           | -0.0015                         | 0.4739                          | 0.355                    | -      | 99.9               | 997.7  | 6.7           |
| 90                                                                                                                                          | 5       | 192.0                           | 0.0083                          | 0.6307                          | 0.380                    | 61.6   | 99.9               | 997.9  | 6.6           |
| 22                                                                                                                                          | 5       | 207.3                           | 0.0075                          | 0.7550                          | 0.123                    | 67.8   | 99.9               | 1057.9 | 14.7          |
| 73                                                                                                                                          | 5       | 216.2                           | -0.0007                         | 0.2790                          | 0.470                    | -      | 100.0              | 1092.8 | 5.2           |
| 68                                                                                                                                          | 5       | 226.3                           | 0.0021                          | 0.2732                          | 0.588                    | 238.1  | 100.0              | 1130.7 | 4.7           |
| 81                                                                                                                                          | 5       | 242.5                           | 0.0044                          | 0.3459                          | 0.570                    | 114.8  | 100.0              | 1190.1 | 4.2           |
| 66                                                                                                                                          | 5       | 245.2                           | -0.0011                         | 0.0687                          | 0.833                    | -      | 100.0              | 1200.2 | 2.5           |

Argon data for Wirt member samples.

| ID                                                                                                                                          | Power   | $^{40}\text{Ar}/^{39}\text{Ar}$ | $^{37}\text{Ar}/^{39}\text{Ar}$ | $^{36}\text{Ar}/^{39}\text{Ar}$ | $^{39}\text{Ar}_K$       | K/Ca  | $^{40}\text{Ar}^*$ | Age    | $\pm 1\sigma$ |
|---------------------------------------------------------------------------------------------------------------------------------------------|---------|---------------------------------|---------------------------------|---------------------------------|--------------------------|-------|--------------------|--------|---------------|
|                                                                                                                                             | (watts) |                                 |                                 | ( $\times 10^{-3}$ )            | ( $\times 10^{-15}$ mol) |       | (%)                | (Ma)   | (Ma)          |
| <b>6-2-15-C, Sanidine/Microcline, J=0.0037788<math>\pm</math>0.01%, IC=1.006702<math>\pm</math>0.0010652, NM-289F, Lab#=65506, Argus VI</b> |         |                                 |                                 |                                 |                          |       |                    |        |               |
| 59                                                                                                                                          | 5       | 246.0                           | 0.0047                          | 0.6675                          | 0.252                    | 108.8 | 99.9               | 1202.4 | 10.3          |
| 24                                                                                                                                          | 5       | 250.1                           | 0.0088                          | 1.175                           | 0.259                    | 58.1  | 99.9               | 1216.7 | 9.6           |
| 70                                                                                                                                          | 5       | 253.3                           | 0.0024                          | 0.6224                          | 0.367                    | 210.5 | 99.9               | 1228.6 | 6.6           |
| 77                                                                                                                                          | 5       | 254.6                           | 0.0045                          | 0.7589                          | 0.520                    | 113.3 | 99.9               | 1233.0 | 4.9           |
| 38                                                                                                                                          | 5       | 262.0                           | 0.0047                          | 0.5123                          | 0.277                    | 107.7 | 99.9               | 1259.2 | 9.2           |
| 57                                                                                                                                          | 5       | 270.5                           | 0.0017                          | 0.6369                          | 0.393                    | 296.3 | 99.9               | 1288.4 | 5.9           |

**Notes:**

Isotopic ratios corrected for blank, radioactive decay, and mass discrimination, not corrected for interfering reactions.

Errors quoted for individual analyses include analytical error only, without interfering reaction or J uncertainties.

Mean age is weighted mean age of Taylor (1982). Mean age error is weighted error

of the mean (Taylor, 1982), multiplied by the root of the MSWD where MSWD>1, and also

incorporates uncertainty in J factors and irradiation correction uncertainties.

"-". K/Ca not determined due to non-detectable  $^{37}\text{Ar}$  above blank level

IC = measured  $^{40}\text{Ar}/^{36}\text{Ar}$  of air standard divided by 295.5

Isotopic abundances after Steiger and Jäger (1977).

Data shown in red are analyses used to determine maximum deposition age.

Ages calculated relative to FC-2 Fish Canyon Tuff Sanidine interlaboratory standard at 28.201 Ma (Kuiper et al., 2008)

Decay Constant ( $\lambda_K$  (total)) =  $5.463\text{e-}10$  /a (Min et al., 2000)
